1 **Title: *Drosophila suzukii* oxidative stress response involves *Jheh* gene cluster but not transposable**  
2 **elements**

3

4 **Running title: *D. suzukii* stress response and *Jheh***

5

6 Authors : Pierre Marin<sup>1</sup>, Angelo Jacquet<sup>1</sup>, H el ene Henri<sup>1</sup>, Patricia Gibert<sup>1</sup> & Cristina Vieira<sup>1</sup>

7 <sup>1</sup>Laboratoire de Biom etrie et Biologie Evolutive UMR 5558, CNRS, Universit  Lyon 1, Universit   
8 de Lyon, Villeurbanne, France

9 Corresponding author's email : [patricia.gibert@univ-lyon1.fr](mailto:patricia.gibert@univ-lyon1.fr), [cristina.vieira@univ-lyon1.fr](mailto:cristina.vieira@univ-lyon1.fr)

10

11 **Keywords:** invasive species, gene expression, rapid adaptation, paraquat, genotypes

12

13

14

15

16

17

18

19

20

21

22

23

24

25

26

27

28

29

## 30 **Summary statement**

31 The responses to oxidative stress of the invasive species, *Drosophila suzukii*, show variability  
32 between genotypes related to their invasion status. The genes of the juvenile hormone epoxide  
33 hydrolase cluster are involved in this response.

34

## 35 **ABSTRACT**

36 The study of the mechanisms involved in adaptation remains a timely issue, particularly in the  
37 context of global changes. To better understand these mechanisms of rapid adaptation, invasive  
38 species are a good model because they are subjected to new and/or different environmental  
39 factors. Using different lines of different geographical origin of the invasive pest *Drosophila*  
40 *suzukii*, we characterized the phenotypic response to oxidative stress. Subsequently, we tested  
41 the involvement of the *Jheh* gene cluster in this response and the possible role of transposable  
42 elements. We show that the resistance to oxidative stress of the lines appears to be related to  
43 their invasive status and we confirm the role of the *Jheh* gene cluster in this response. We have  
44 not identified any transposable elements in this gene region that could influence the expression  
45 of the gene.

46

## 47 **INTRODUCTION**

48 The rapid spread of invasive species in a huge spectrum of environments relies on multiple  
49 factors, from genetics to phenotypic plasticity, probably including fine molecular mechanism such  
50 as hormonal production or epigenetic gene regulation (Beldade *et al.*, 2011; Marin *et al.*, 2019;  
51 Stapley *et al.*, 2015). Phenotypic plasticity, i.e., the ability of a genotype to express different  
52 phenotypes in different environments (Ghalambor *et al.*, 2015) has been proposed as one of the  
53 most promising explanations for invasive success, particularly in the case of founder population  
54 depleted of genetic variation (Estoup *et al.*, 2016; Marin *et al.*, 2019). Among deleterious  
55 environments that can be encountered by invasive species, oxidative stress caused by  
56 phytosanitary products is one of them. The invasive pest, *Drosophila suzukii*, is a good model to  
57 investigate the adaptive process during invasion (Gibert *et al.*, 2016). This species which belong  
58 to the group of the fruit fly *D. melanogaster*, originally comes from Asia and was detected  
59 simultaneously both in North America (U.S.A) and in Europe in 2008. North America was invaded  
60 by native Japan populations derived from Hawaii. In Europe, several introductions were detected  
61 from U.S.A and from China (Frainout *et al.*, 2017). Currently, *D. suzukii* is present in both North  
62 and South America, in Europe from the south (Spain) to the East (Poland, Ukraine) and it has  
63 also been observed in Russia (CABI, 2020; Lavrinienko *et al.*, 2017).

64 Characterization of the phenotypic and molecular responses of *D. suzukii* to changing  
65 environmental conditions may provide information to the mechanisms involved in the ability of  
66 invasive species to cope with environmental variation. Paraquat (N,N'-dimethyl-4,4'-bipyridinium  
67 dichloride) is one of the most widely used herbicide in the world leading to the production of ROS  
68 (reactive oxygen species) (Tsai, 2018). Oxidative stress due to the use of paraquat in the field  
69 has also been used in the laboratory as a good proxy for studying stress resistance (Bus J S and  
70 Gibson J E, 1984; Rzezniczak *et al.*, 2011). Paraquat was banned since 2007 in Europe but is  
71 still used in many other regions like in U.S.A or Japan. Paraquat exposition is known to induce a  
72 reduction in the lifespan associated with changes in gene expression (Finkel and Holbrook, 2000;  
73 Liguori *et al.*, 2018; Vermeulen *et al.*, 2005). One of the candidate genes involved in paraquat  
74 resistance is the cluster of *Jheh* (*Juvenile hormone epoxide hydrolase*) genes, which are not only  
75 involved in the lifespan but also in response to the oxidative environment (Flatt and Kawecki,  
76 2007; Guio *et al.*, 2014). Moreover in *D. melanogaster*, an insertion of a transposable element  
77 (TE) *Bari-Jheh*, near the cluster of the *Jheh* genes has been described as driving an increase of  
78 resistance in presence of paraquat (Guio *et al.*, 2014).

79 Using several strains of *D. suzukii*, we measured responses to oxidative stress at the phenotypic  
80 and molecular level. We made the hypothesis that different genetic backgrounds from native and  
81 invasive populations will have different responses to oxidative stress and that the *Jheh* cluster  
82 may be involved on it. Due to the over-representation of TEs in the genome of *D. suzukii* (33% of  
83 the repeated elements, (Sessegolo *et al.*, 2016)), compared to other *Drosophila* species, we  
84 looked for the presence of TEs in this region in the different lines. We monitored lifespan after  
85 paraquat exposure and measured the expression of three genes of *Jheh* cluster *Jheh-1*, *Jheh-2*  
86 and *Jheh-3* in six isofemale lines, four from the invasive regions, North America (Watsonville and  
87 Dayton) and France (Paris and Montpellier) and two from the native area, Japan (Sapporo and  
88 Tokyo). We evaluated the genetic diversity within and between lines by sequencing introns of the  
89 *Jheh* genes, searched for TEs and for transcription factor binding sites (TFBS). Our results  
90 suggest a strong effect of the genotype on the resistance to stress and changes in *Jheh*  
91 expression levels, with no link with TEs.

92

## 93 MATERIAL AND METHODS

### 94 *Drosophila suzukii* lines and rearing conditions

95

96 *D. suzukii* lines were sampled in 2014 from one native country (Japan: Sapporo and Tokyo) and  
97 2 invaded areas (USA: Watsonville and Dayton and France: Montpellier and Paris). Field-  
98 inseminated females were isolated to establish half-sib families called isofemale lines commonly

99 used to investigate *Drosophila* natural populations (David *et al.*, 2005). Flies were reared in  
100 modified medium (drosophila agar type, ref.66-103, Apex™, 9 g.L<sup>-1</sup> ; cornmeal 33 g.L<sup>-1</sup> ; yeast,  
101 dried yeast, ref.75570, LYNSIDE® 17 g.L<sup>-1</sup> ; industrial sugar 50 g.L<sup>-1</sup> ; nipagin, Tegosept, ref.20-  
102 258, Apex™ 4 g.L<sup>-1</sup> ; 96% ethanol 40 ml.L<sup>-1</sup> ; distilled water 1 L) from Dalton *et al.*, (2011), in a  
103 humidified, temperature-controlled incubator at 22.5°C, 70 % of relative humidity and a 16:8 LD  
104 cycle. The recipe of the modified medium was to bring to boil agar, cornmeal, yeast extract and  
105 sugar in distilled water. Then wait out of the fire about 10 minutes until the mixture cooled to 53°C  
106 before adding diluted nipagin in 96% ethanol. Medium is then poured in vials and cooled at room  
107 temperature before to be stored at 4°C. All the experiments were made with 4 to 7 days old flies.

## 108 **Oxidative stress resistance experiments**

109 We used paraquat (methyl viologen dichloride hydrate, ref. 75365-73-0, Sigma-Aldrich®) to mimic  
110 oxidative stress. Oxidative stress was assessed by adding paraquat directly in the medium (10  
111 mM) before the cooling step and below 53°C. The control experiment was made with the same  
112 medium but without paraquat. We used one isofemale line per locality (total of six) named  
113 Montpellier (France), Paris (France), Sapporo (Japan), Tokyo (Japan), Dayton (U.S.A.) and  
114 Watsonville (U.S.A.). We made three replicates per line and per sex, with ten flies per replicate.  
115 Survival was monitored every 24h. Flies were transferred into new vials every three to four days  
116 to limit microbial development.

## 117 **RT-qPCR analysis of *Jheh* genes**

118 We quantified the expression of the three *Jheh* genes (*Jheh-1*, *Jheh-2* and *Jheh-3*) by RT-qPCR  
119 after induction of oxidative stress and in control condition. Adult males and females were exposed  
120 during 24h to medium culture with 20 mM of paraquat. After 24h the flies were immediately  
121 dissected in PBS 1X solution (Gibco Thermo-Fisher) in order to extract carcasses for both sexes  
122 and eliminate germline tissues. We made three replicates per sex and treatment and used four  
123 flies per replicate.

124 RNA extraction was made using Direct-zol™-96 RNA Kits (Zymo Research), following the  
125 manufacturer recommendations and RNA was treated with DNase. cDNA were obtained from 0.5  
126 µg of RNA using SuperScript™ IV VIL0™ Master Mix (Invitrogen). RT negative control was made  
127 with RNA but without the reverse transcriptase to control for genomic DNA contamination. cDNA  
128 were stored at -80°C before the quantification step. Gene expression was then quantified by  
129 quantitative PCR and *Rp49* was used as housekeeping gene. Primers were designed using the  
130 *D. suzukii* referenced genome (Table S1, (Chiu *et al.*, 2013)). Their efficiency was between 91.1%  
131 to 97.2% (*RP49*: 91.6 %, *Jheh-1*: 97.2%, *Jheh-2*: 95.2%, *Jheh-3*: 91.1%). 2 µl of the cDNA sample  
132 were supplemented with 5 µL of SsoADV Universal SYBR Green Supermix (BioRad) mix 2X, 0.3

33  $\mu\text{l}$  of each primer (10 $\mu\text{M}$ ) and 2.4  $\mu\text{l}$  of pure water. We made technical duplicates for each sample.  
34 PCR reactions were made in a BioRAAd CFX-96 with a program consisted of an initial activation  
35 of 95°C for 10 minutes and then 40 cycles each comprising 15 seconds at 95°C, 10 seconds at  
36 60°C and 72°C .

### 37 **Genetic diversity of isofemale lines**

38 We sequenced intronic regions of *Jheh* gene cluster of the six lines used in this study. DNA was  
39 extracted individually from 10 females per line with the 96-Well Plate Animal Genomic DNA  
40 Miniprep kit (ref. BS437, Biobasic) following the manufacturer instructions. Primers were designed  
41 to flank the intronic regions for the three *Jheh* genes (Table S1) and Phusion high fidelity DNA  
42 Polymerase (2 U/ $\mu\text{L}$ ) (F-530XL Thermofisher Scientific) was used to amplify sequences. The  
43 same PCR program was used for all primers pairs: 98°C for 10 minutes, followed by 40 cycles  
44 composed of 30 seconds at 98°C, 1 minute at 56°C and 20 seconds at 72°C and a final elongation  
45 step for 1 minute at 72°C. The sequencing of the two strands was done directly from the PCR  
46 product by BIOFIDAL sequencing company (Vaulx en Velin, France). Sequences were manually  
47 curated with CLC Main Workbench 8 software (Qiagen) before being aligned with the Muscle  
48 program implemented in the workbench to generate haplotypes by line for each intron. MEGA X  
49 software was used to calculate pairwise comparison and nucleotide diversity using p-method  
50 option (Table S2-S3) (Kumar *et al.*, 2018).

### 51 **Detection of Transposable elements and transcription factor binding sites**

52 We sequenced the intergenic regions of the *Jheh* gene cluster, plus the 5' and 3' regions  
53 of the cluster (Table S1). DNA was extracted from one female per population as described above.  
54 Classical PCR method was used with the following program, 10 minutes at 95°C followed by  
55 several cycles composed of 30 seconds at 95°C, 30 seconds at 63°C, 3 minutes at 72°C and a  
56 final elongation of 15 minutes at 72°C. The number of cycles was 25 for the region before *Jheh-1*  
57 and between *Jheh-1* and *Jheh-2*, 35 cycles for the region between *Jheh-2* and *Jheh-3* and 30  
58 cycles after *Jheh-3*. We identified TEs in the intergenic regions by a blast against a homemade  
59 data base of the TE sequences from the *D. suzukii* reference genome (Paris *et al.*, 2020, Mérel  
60 *et al.*, *in prep.*).

61 For TFBS (Table 1), we used conSite website to screen all TFBS from insect in our sequences  
62 (Sandelin *et al.*, 2004). To complete our analysis, we used the TFBS obtained from Villanueva-  
63 Cañas *et al.* (2019) and we extracted PFM (position frequency matrix) of the 14 TFBS from the  
64 JASPAR2018 database (v.1.1.1) (Parcy *et al.*, 2017). Then, we used TFBSTools (v.1.22.0)  
65 package from R software (v. 3.6.0) to convert in PWM (position weight matrix), and then search

66 on the 6 lines and the reference genome of *D. suzukii* (Paris *et al.*, 2020; R Core Team, 2019;  
67 Tan and Lenhard, 2016).

## 68 **Statistical analysis**

### 69 **Survival monitoring**

70 Survival data were analyzed using a linear mixed model with lmer function from lme4 provided on  
71 R (v. 3.6.0) after a log transformation, confirmation of normality and homoscedasticity (Bates *et*  
72 *al.*, 2015). This model was chosen after log-likelihood comparison between models (linear model  
73 with raw or log transformed data, survival model with a Weibull distribution).

74 We analyzed sexes separately to limit interaction terms, and focused on the effect of the  
75 treatment, the lines and their interaction. Biological replicates were added as random effect and  
76 we plotted exponential of the values and associated confidence interval on the Fig. S1. Those  
77 effects can be interpreted as multiplicative effect on the mean lifespan compared to the reference  
78 chosen here as the non-exposed group from Sapporo (*e.g.* the Sapporo reference is centered on  
79 1 and the effect of paraquat 0.18 involves a survival time under paraquat for Sapporo of 0.18 or  
80 18% of the survival time without paraquat).

81

### 82 **qPCR analysis**

83 RT-qPCR raw data were analyzed using R and EasyqpcR library (1.21.0) for the quantification  
84 and normalization with *RP49* (Sylvain, 2012). Data were analyzed separately for the three genes  
85 (*Jheh-1 -2* and *-3*) and sex using a linear model (ANOVA2, Table S4) after log transformation to  
86 validate homoscedasticity and normality. Pairwise comparisons were made using a Tuckey test.

## 87 **RESULTS**

### 88 ***D. suzukii* wild type lines have significant differences in life span**

89 To investigate the influence of the genotypes from different geographical origins on the  
90 lifespan, we compared the invasive and native *D. suzukii* lines in control condition (Fig. 1A, Fig.  
91 S1 & Table 2). The lifespan ranges from 31 to 55 days for females and from 25 to 45 days for  
92 males. For females we observed a strong genotype effect related to geographic location: the  
93 genotypes that lived the longest were those of Dayton and Paris (about 1.88-1.96 times more  
94 than Sapporo, Fig. S1). Sapporo, Tokyo, and Watsonville were not significantly different and with  
95 the lowest lifespan. For males, the four invasive genotypes from Europe and U.S.A had a higher  
96 lifespan than Sapporo. Tokyo was similar to Sapporo.

97 As expected, exposure to paraquat reduced life span on average from 82 to 77% for  
98 females and males (Fig. 1A, Fig. S1). The two lines with the best paraquat resistance in absolute  
99 value were still Dayton and Paris in both sexes (Fig. 1A and Table 2). We then wanted to have  
00 an estimate of paraquat sensitivity (i.e., the slope difference Fig.1 B) taking into account the  
01 longevity of each line by estimating the value of the interaction coefficients (i.e., the slope  
02 difference compared to Sapporo) in Table 2 and statistically tested in Fig. S1. Again, the effect  
03 was not similar between genotypes and sexes. For females, Paris was the line presenting  
04 significantly the highest sensitivity (-0.87, Table 2) with a reduction of 28% of the life span  
05 compared to Sapporo (Fig. S1). For males, the reduction in life span was significantly the highest  
06 for Montpellier and Watsonville (-0.84 and -0.83) with a reduction from 34 and 32% by comparison  
07 with Sapporo. These results reveal a strong genotype-by-environment interaction in the response  
08 to oxidative stress and also a sex effect. It is interesting to note that despite the shorter life span  
09 of Japanese genotypes, and in particular of Sapporo in the absence of treatment, these genotypes  
10 were the most resistant to paraquat exposure, as shown by the lowest ratio of paraquat lifetime  
11 to control lifetime (Table 2).

12

### 13 ***Jheh* genes expression changes with the paraquat treatment**

14 To investigate the effect of paraquat-mediated oxidative stress on the gene expression  
15 level, we focused on *Jheh* gene cluster described as potentially involved in stress response in  
16 insects and mammals (Guio *et al.*, 2014; Oesch *et al.*, 2000). We quantified the level of expression  
17 of the *Jheh* genes (*Jheh-1*, *Jheh-2* and *Jheh-3*) in adult males and females flies for the six  
18 genotypes described above (Fig. 2).

19 We observed strong differences between males and females. For males, gene expression  
20 was not significantly different between control and paraquat treatment for the six genotypes and  
21 for the three gene. In females, the effect of paraquat was different according to the gene and the  
22 genotype (Table S4). For *Jheh-1* and *Jheh-2*, oxidative stress resulted in a significant increase of  
23 gene expression for the two French genotypes and the Tokyo genotype. On the contrary, the  
24 Sapporo genotype exhibited a significant reduction of *Jheh-1* expression in presence of paraquat.  
25 For *Jheh-3*, we observed a downregulation of the gene expression only for the Sapporo genotype.

### 26 **Low Genetic diversity of lines in *Jheh* cluster**

27 To assess the levels of neutral genetic diversity within and between lines, we sequenced intronic  
28 regions for *Jheh* genes for each genotype (Fig. 3). As expected, the within-line polymorphism was  
29 very low (Table 3, Fig. S2), with the exception of Watsonville with 0.0792 for the first intron of  
30 *Jheh-1*. The number of haplotypes was also low (Table S2). The first intron of *Jheh-2* presents

31 the highest levels of diversity, contrasting with the other introns. This corresponds to a residual  
32 polymorphism that is still present in the lines despite the laboratory rearing.

33 Depending on the intronic regions we found between two to four haplotypes per genotype  
34 (Table S2). We computed the diversity between genotypes (global intronic nucleotide diversity  $\pi$ )  
35 using the most common haplotype for each intron, showing that on average these values are very  
36 small, with the highest value for *Jheh-2.1* as mentioned above (Table S3).

### 37 **Jheh harbour transcription factor binding sites (TFBS)**

38  
39 Transcription factor binding site (TFBS) are *cis* regulatory sequences that are recognized  
40 by transcription factors and modify gene expression. Several TFBS are known to be involved  
41 during oxidative response. We detected 9 of the 14 previous identified TFBS in the intergenic  
42 regions: HIF1A, br, cad, Cf2, Deaf1, CnC, dl, hb and Ubx (Fig. 3 & 4, Table S5). Comparison of  
43 the number of TFBS between genotypes (Fig. 4) revealed several differences but not clear link  
44 with the changes in expression observed for the *Jheh* genes. For example, the Sapporo genotype  
45 which consistently showed a decrease in the expression of all three genes, did not appear to have  
46 a different specific TFBS. The two French genotypes which exhibited systematically an increase  
47 of expression after paraquat treatment appeared to have an increased number of putative TFBS.  
48 For example, the two French genotypes showed two Deaf1 motives when compared to the other  
49 genotypes upstream of TSS of the *Jheh-1* gene. In the case of the *Jheh-2* gene, the French  
50 genotypes presented a significant number of TFBS, with for example six TFBS for the Montpellier  
51 genotype (2Ubx, 2hb, CnC and cad). In this region, no genotype showed the same pattern of  
52 TFBS and it was similar for *Jheh-3*.

53

### 54 **Transposable elements do not affect *Jheh* gene expression**

55 The presence of TE in the vicinity or within the *Jheh* cluster could impact the gene  
56 expression during oxidative stress because they could bring Antioxidant Response Element for  
57 transcription factors or by modifying chromatin state (Guio and González, 2015; Guio *et al.*, 2014).  
58 Surprisingly, and even if *D. sukuzii* harbors more than 30% of TEs, no full insertion was observed  
59 in the *Jheh* cluster indicating that we are probably in regions of high recombination. However, we  
60 did identify small pieces of TE that are quite conserved between the genotypes but no TFBS were  
61 detected in these sequences (Fig. 3, Table 4 & S5). No obvious link seems to exist between gene  
62 expression and the presence of TE in the *Jheh* cluster.

## 63 **DISCUSSION**

64



65 A growing body of literature suggests that responses to oxidative stress in *Drosophila* may  
66 be mediated by insertions of TEs, that in some cases could affect gene expression or the  
67 chromatin structure (Guio *et al.*, 2014). In *D. melanogaster*, the *Jheh* gene cluster has been shown  
68 to be involved in the response to paraquat treatment and associated with local adaptation. Guio  
69 *et al.* (2014) compared *D. melanogaster* genotypes with and without Bari-Jheh TE insertion, and  
70 showed that, (i) TE insertion had a cost in the absence of stress, (ii) TE insertion confer increased  
71 survival in the presence of oxidative stress, (iii) TE insertion provides antioxidant response  
72 elements (AREs) that contribute to altered gene expression (Guio and González, 2015; Guio *et*  
73 *al.*, 2014). In this study, we analyzed the expression of the *Jheh* gene cluster in several genotypes  
74 of *D. sukuzii* to test whether the *Jheh* gene cluster is involved in the oxidative stress response  
75 and whether TEs could also be associated with alterations in gene expression.

76 We first measured the life span of flies without treatment. We showed that flies of the  
77 Japanese genotypes exhibited the shortest lifespan in both males and females. Surprisingly,  
78 these lines showed an increased resistance to oxidative stress. The French lines were more  
79 sensitive to paraquat than the American ones, although notable differences were observed  
80 between lines from the same continent. The negative association we observed between longevity  
81 and paraquat resistance had not been observed in previous work with *D. melanogaster*, in which  
82 the opposite association was observed (Finkel and Holbrook, 2000; Liguori *et al.*, 2018). It could  
83 be argued that the use of paraquat in Europe has been banned since 2007, which could lead to  
84 a loosening of selection on genes related to paraquat resistance, as observed in other organisms  
85 (Campos *et al.*, 2014; Shaw, 2000).

86 We then measured the expression of the *Jheh* genes previously reported to be involved in  
87 the oxidative response. Consistent with the literature of *D. melanogaster*, we found sex-specific  
88 responses to oxidative stress (Guio *et al.*, 2014; Weber *et al.*, 2012). For *Jheh-1* and *Jheh-2*, we  
89 observed a significant effect of genotype and treatment, but only for females, contrary to what  
90 was reported in *D. melanogaster*. For *Jheh-3*, treatment and genotype effect were significant for  
91 both males and females. These differences in gene expression could not be associated with the  
92 presence of TEs insertions, since only partial sequences were present in the intergenic regions.  
93 The presence of various TFBS could contribute to the observed differences. We also quantified  
94 the polymorphism in our lines, which could be associated with differences in gene expression.  
95 We did not observe total homozygosity in the lines but genetic diversity was much lower than  
96 what is observed in natural populations of *D. melanogaster*. Lack *et al.* (2016) studied populations  
97 from several continents and measured values of nucleotide diversity of up to 0.401 within the  
98 population. For inbred DGRP (*Drosophila* Genetic Reference Panel) lines, the mean intronic  
99 diversity was  $0.0076 \pm 0.008$ , which is close to the values we observed (Mackay *et al.*, 2012). It

00 is therefore unlikely that the residual polymorphism in the *Jheh* gene region can explain the  
01 differences in gene expression.

02 The striking result in our analysis is the similar pattern of changes in the expression of  
03 *Jheh-1* and *Jheh-2* in females of European genotypes, with an increase in expression, which was  
04 associated with lower resistance to oxidative stress, since these are the most sensitive genotypes.  
05 On the contrary, the Sapporo genotype systematically showed a reduction in the expression levels  
06 of the three genes, which could also be associated with increased resistance in the presence of  
07 paraquat, but this was not observed for the Tokyo genotype.

08

09

## 10 **Conclusion**

11 In conclusion, our work shows for the first time how various genotypes of *D. suzukii*  
12 respond to oxidative stress and suggests that populations found in invaded areas are more  
13 sensitive than Japanese populations, specially the French ones. We have also confirmed that the  
14 *Jheh* gene cluster is involved in the response to oxidative stress also in *D. suzukii*, independently  
15 of the presence of TE in intergenic regions. This work also suggests that the genetic background  
16 and probably trans regulatory sequences are involved in gene expression and stress response.  
17 Further phenotypic and genomic studies on natural populations are needed to better understand  
18 the success of invasive species such as *D. suzukii*.

19

## 20 **Acknowledgements**

21 We thanks to Vincent Mérel who produced the TEs annotation.

22 P. M. produced data, conceived and wrote the manuscript draft. C. V. & P.G. designed  
23 experiments, edited the manuscript. A. J. calibrated experimental design. H. H. helped to q-PCR  
24 method and analysis.

## 25 **Funding**

26 Experimental procedures were supported by the ANR (grant SWING ANR to P.G. and C.V. grant  
27 ExHyb ANR to C.V.) and the Rovaltain foundation (EpiRip project).

28

## 29 **Author's informations**

30 Cristina Vieira: <https://orcid.org/0000-0003-3414-3993>

31 Pierre Marin: <https://orcid.org/0000-0002-8304-138X>

32 Patricia Gibert: <https://orcid.org/0000-0002-9461-6820>

33

34 **Competing interests**

35 The authors declare that they have no competing interests.

36

37 **Bates, D., Mächler, M., Bolker, B. M. and Walker, S. C.** (2015). Fitting linear mixed-effects  
38 models using lme4. *Journal of Statistical Software* **67**,.

39 **Beldade, P., Mateus, A. R. A. and Keller, R. A.** (2011). Evolution and molecular mechanisms  
40 of adaptive developmental plasticity. *Molecular Ecology* **20**, 1347–1363.

41 **Bus J S and Gibson J E** (1984). Paraquat: model for oxidant-initiated toxicity. *Environmental*  
42 *Health Perspectives* **55**, 37–46.

43 **CABI** (2020). CABI. Invasive Species Compendium. Wallingford, UK: CAB International. *CABI*.

44 **Campos, M. R., Rodrigues, A. R. S., Silva, W. M., Silva, T. B. M., Silva, V. R. F., Guedes, R.**  
45 **N. C. and Siqueira, H. A. A.** (2014). Spinosad and the Tomato Borer *Tuta absoluta*: A  
46 Bioinsecticide, an Invasive Pest Threat, and High Insecticide Resistance. *PLoS One* **9**,.

47 **Chiu, J. C., Jiang, X., Zhao, L., Hamm, C. A., Cridland, J. M., Saelao, P., Hamby, K. A., Lee,**  
48 **E. K., Kwok, R. S., Zhang, G., et al.** (2013). Genome of *Drosophila suzukii*, the Spotted  
49 Wing *Drosophila*. *G3: Genes, Genomes, Genetics* **3**, 2257–2271.

50 **Dalton, D. T., Walton, V. M., Shearer, P. W., Walsh, D. B., Caprile, J. and Isaacs, R.** (2011).  
51 Laboratory survival of *Drosophila suzukii* under simulated winter conditions of the Pacific  
52 Northwest and seasonal field trapping in five primary regions of small and stone fruit  
53 production in the United States. *Pest Management Science* **67**, 1368–1374.

54 **David, J. R., Gibert, P., Legout, H., Pétavy, G., Capy, P. and Moreteau, B.** (2005). Isofemale  
55 lines in *Drosophila*: an empirical approach to quantitative trait analysis in natural  
56 populations. *Heredity* **94**, 3–12.

57 **Estoup, A., Ravign, V., Hufbauer, R., Vitalis, R., Gautier, M. and Facon, B.** (2016). Is There  
58 A Genetic Paradox of Biological Invasion? *Annual Review of Ecology Evolution and*  
59 *Systematics* **47**, 51–72.

60 **Finkel, T. and Holbrook, N. J.** (2000). Oxidants, oxidative stress and the biology of ageing.  
61 *Nature* **408**, 239–247.

62 **Flatt, T. and Kawecki, T. J.** (2007). Juvenile Hormone as a Regulator of the Trade-Off Between  
63 Reproduction and Life Span in *Drosophila Melanogaster*. *Evolution* **61**, 1980–1991.

64 **Fraimout, A., Debat, V., Fellous, S., Hufbauer, R. A., Foucaud, J., Pudlo, P., Marin, J.-M.,**  
65 **Price, D. K., Cattell, J., Chen, X., et al.** (2017). Deciphering the routes of invasion of  
66 *Drosophila suzukii* by means of ABC random forest. *Molecular biology and evolution* **34**,  
67 980–996.

68 **Ghalambor, C. K., Hoke, K. L., Ruell, E. W., Fischer, E. K., Reznick, D. N. and Hughes, K.**  
69 **a.** (2015). Non-adaptive plasticity potentiates rapid adaptive evolution of gene expression  
70 in nature. *Nature* **525**, 372–375.

71 **Gibert, P., Hill, M., Pascual, M., Plantamp, C., Terblanche, J. S., Yassin, A. and Sgrò, C. M.**  
72 (2016). *Drosophila* as models to understand the adaptive process during invasion.  
73 *Biological Invasions* **18**, 1089–1103.

- 74 **Guio, L. and González, J.** (2015). The Dominance Effect of the Adaptive Transposable  
75 Element Insertion Bari-Jheh Depends on the Genetic Background. *Genome Biol Evol* **7**,  
76 1260–1266.
- 77 **Guio, L., Barrón, M. G. and González, J.** (2014). The transposable element Bari-Jheh  
78 mediates oxidative stress response in *Drosophila*. *Molecular Ecology* **23**, 2020–2030.
- 79 **Kumar, S., Stecher, G., Li, M., Knyaz, C. and Tamura, K.** (2018). MEGA X: Molecular  
80 Evolutionary Genetics Analysis across Computing Platforms. *Mol Biol Evol* **35**, 1547–  
81 1549.
- 82 **Lack, J. B., Lange, J. D., Tang, A. B., Corbett-Detig, R. B. and Pool, J. E.** (2016). A  
83 Thousand Fly Genomes: An Expanded *Drosophila* Genome Nexus. *bioRxiv* 063537.
- 84 **Lavrinenko, A., Kesäniemi, J., Watts, P. C., Serga, S., Pascual, M., Mestres, F. and**  
85 **Kozeretska, I.** (2017). First record of the invasive pest *Drosophila suzukii* in Ukraine  
86 indicates multiple sources of invasion. *Journal of Pest Science* **90**, 421–429.
- 87 **Liguori, I., Russo, G., Curcio, F., Bulli, G., Aran, L., Della-Morte, D., Gargiulo, G., Testa, G.,**  
88 **Cacciatore, F., Bonaduce, D., et al.** (2018). *Oxidative stress, aging, and diseases*. Dove  
89 Medical Press Ltd.
- 90 **MacKay, T. F. C., Richards, S., Stone, E. A., Barbadilla, A., Ayroles, J. F., Zhu, D., Casillas,**  
91 **S., Han, Y., Magwire, M. M., Cridland, J. M., et al.** (2012). The *Drosophila*  
92 *melanogaster* Genetic Reference Panel. *Nature* **482**, 173–178vi.
- 93 **Marin, P., Genitoni, J., Barloy, D., Maury, S., Gibert, P., Ghalambor, C. K. and Vieira, C.**  
94 (2019). Biological invasion: The influence of the hidden side of the (epi)genome.  
95 *Functional Ecology* **34**, 385–400.
- 96 **Oesch, F., Herrero, M. E., Hengstler, J. G., Lohmann, M. and Arand, M.** (2000). Metabolic  
97 Detoxification: Implications for Thresholds. *Toxicologic Pathology* **28**, 382–387.
- 98 **Parcy, F., Khan, A., Baranasic, D., Kulkarni, S. R., Stigliani, A., van der Lee, R.,**  
99 **Vandepoele, K., Gheorghe, M., Lenhard, B., Tan, G., et al.** (2017). JASPAR 2018:  
00 update of the open-access database of transcription factor binding profiles and its web  
01 framework. *Nucleic Acids Research* **46**, D260–D266.
- 02 **Paris, M., Boyer, R., Jaenichen, R., Wolf, J., Karageorgi, M., Green, J., Cagnon, M.,**  
03 **Parinello, H., Estoup, A., Gautier, M., et al.** (2020). Near-chromosome level genome  
04 assembly of the fruit pest *Drosophila suzukii* using long-read sequencing. *bioRxiv*  
05 2020.01.02.892844.
- 06 **R Core Team** (2019). R: A Language and Environment for Statistical Computing.
- 07 **Rzeczniczak, T. Z., Douglas, L. A., Watterson, J. H. and Merritt, T. J. S.** (2011). Paraquat  
08 administration in *Drosophila* for use in metabolic studies of oxidative stress. *Analytical*  
09 *Biochemistry* **419**, 345–347.
- 10 **Sandelin, A., Wasserman, W. W. and Lenhard, B.** (2004). ConSite: web-based prediction of  
11 regulatory elements using cross-species comparison. *Nucleic Acids Res* **32**, W249–  
12 W252.
- 13 **Sessegolo, C., Burlet, N. and Haudry, A.** (2016). Strong phylogenetic inertia on genome size  
14 and transposable element content among 26 species of flies. *Biology Letters* **12**,  
15 20160407.

- 16 **Shaw, M. W.** (2000). Models of the Effects of Dose Heterogeneity and Escape on Selection  
17 Pressure for Pesticide Resistance. *Phytopathology*<sup>TM</sup> **90**, 333–339.
- 18 **Stapley, J., Santure, A. W. and Dennis, S. R.** (2015). Transposable elements as agents of  
19 rapid adaptation may explain the genetic paradox of invasive species. *Molecular Ecology*  
20 **24**, 2241–2252.
- 21 **Sylvain, L. P.** (2012). *EasyqpcR: EasyqpcR for low-throughput real-time quantitative PCR data*  
22 *analysis*. Bioconductor version: Release (3.10).
- 23 **Tan, G. and Lenhard, B.** (2016). TFBSTools: an R/Bioconductor package for transcription  
24 factor binding site analysis. *Bioinformatics* **32**, 1555–1556.
- 25 **Tsai, W.-T.** (2018). Status of herbicide use, regulatory management and case study of paraquat  
26 in Taiwan. *Environment, Development and Sustainability*.
- 27 **Vermeulen, C. J., Van De Zande, L. and Bijlsma, R.** (2005). Resistance to Oxidative Stress  
28 Induced by Paraquat Correlates Well with Both Decreased and Increased Lifespan in  
29 *Drosophila melanogaster*. *Biogerontology* **6**, 387–395.
- 30 **Villanueva-Cañas, J. L., Horvath, V., Aguilera, L. and González, J.** (2019). Diverse families  
31 of transposable elements affect the transcriptional regulation of stress-response genes in  
32 *Drosophila melanogaster*. *Nucleic Acids Res* **47**, 6842–6857.
- 33 **Weber, A. L., Khan, G. F., Magwire, M. M., Tabor, C. L., Mackay, T. F. C. and Anholt, R. R.**  
34 **H.** (2012). Genome-wide association analysis of oxidative stress resistance in *drosophila*  
35 *melanogaster*. *PLoS ONE* **7**,.

## 36 List of the figures

37 Fig. 1. **Mean ( $\pm$ SD) of survival time (days) of *D. suzukii* genotypes (A) and reaction norm (log of the**  
38 **mean) (B).** (A) mean values under control and paraquat condition for females (pink) and males (blue)  
39 with associated SD. (B) reaction norm between treatments (control and paraquat) for both females and  
40 males for the six genotypes using log transformed mean value. The slope differences between the  
41 curves highlight the difference of sensitivity between genotypes.

42 Fig. 2. ***Jheh* gene expression (*Jheh-1, -2, -3*) after normalization by *Rp49* in control (green) and**  
43 **paraquat (red) conditions for females on the left and males on the right.**

44 Fig. 3. **Representation of the *Jheh* gene cluster on the reference genome and the relative position on**  
45 **the other six genotypes.** The blue squares represent the exons and the blue lines the intronic regions.  
46 Red triangles represent TE detected in the intergenic regions and TFBS are indicated by vertical lines.  
47 The scale is shown below the figure in base pairs.

48 Fig. 4. **TFBS detected in the four intergenic regions of the *Jheh* gene cluster in the reference genome**  
49 **and in the six genotypes of *D. suzukii*.** Of the 14 TFBS examined, 8 had at least one positive result. The  
50 intergenic regions are upstream *Jheh-1*(CG18190-*Jheh-1*), between *Jheh-1* and -2 (*Jheh1-Jheh2*),  
51 between *Jheh2* and -3 (*Jheh2-Jheh3*) downstream of *Jheh-3* (*Jheh3-CG43069*).

52

## 53 List of the tables

54 Table 1. **Transcription factor analyzed with the PWM matrix ID from JASPAR2018.** Mainly matrix come  
55 from *D. melanogaster* model, but several as HSF, HIF1 and XBP1 come from human, while MTF1 come  
56 from mice.

57

58 Table 2. **Mean ( $\pm$ SD) survival time (days) for male and female lines of *D. suzukii* under**  
59 **control and paraquat conditions.** Sensitivity represents the exponential of the interaction values  
60 in the model (i.e., the difference in slope between the Sapporo reference and the other genotypes,  
61 see Figure S1). \* indicate a significant difference with the reference (p-value < 0.05).

62 Table 3. **Within-line diversity ( $\pi$ ) for the six genotypes of *D. suzukii* for the seven sequenced intronic**  
63 **regions.** The mean diversity per intron was calculated using the most common sequence of the six  
64 genotypes.

65 Table 4. **Size differences (bp) between the six genotypes and the reference genome.** TE insertions are  
66 indicated by their size or abs if they are absent.

67

## 68 List of supplementary figures

69 Fig. S1. **Representation of the parameters estimated by the model for treatment, genotypes and**  
70 **interactions for females (left) and males (right).** Values were transformed exponentially to be  
71 interpreted as a multiplicator effect. The vertical line corresponds to the reference. Associated p-values  
72 are greater than 0.05 when the confidence interval includes the vertical line.

73 Fig. S2. **Distribution of the between genotype (blue) and within genotype (pink) genetic diversity using**  
74  **$\pi$  values for all intronic regions.**

75

## 76 List of supplementary tables

77

78 Table S1. **Primers used for the PCR experiments.**

79 Table S2. **Genotypes of *D. suzukii* with the number of haplotypes obtained.** The length of the sequence  
80 corresponds to the size of the amplified fragment used to calculate the average diversity per population  
81 per intron. The mean diversity was calculated as the average between the most common haplotypes of  
82 the 6 lines.

83 Table S3. **Pairwise genetic distance between genotypes. Bold values represent genetic diversity within**  
84 **lines.**

85 Table S4. **Summary of the ANOVA 2 by gene and sex.**

86

87 **Table S5. TFBS and TE detected in all six genotypes and the reference genome of *D.***  
88 ***suzukii*.** We screened TFBS in the intergenic regions before, between and after the Jheh genes.  
89 The names of the transcription factors (TF) and transposable elements (TE) are given with their  
90 positions in the sequence (beginning and end).

91

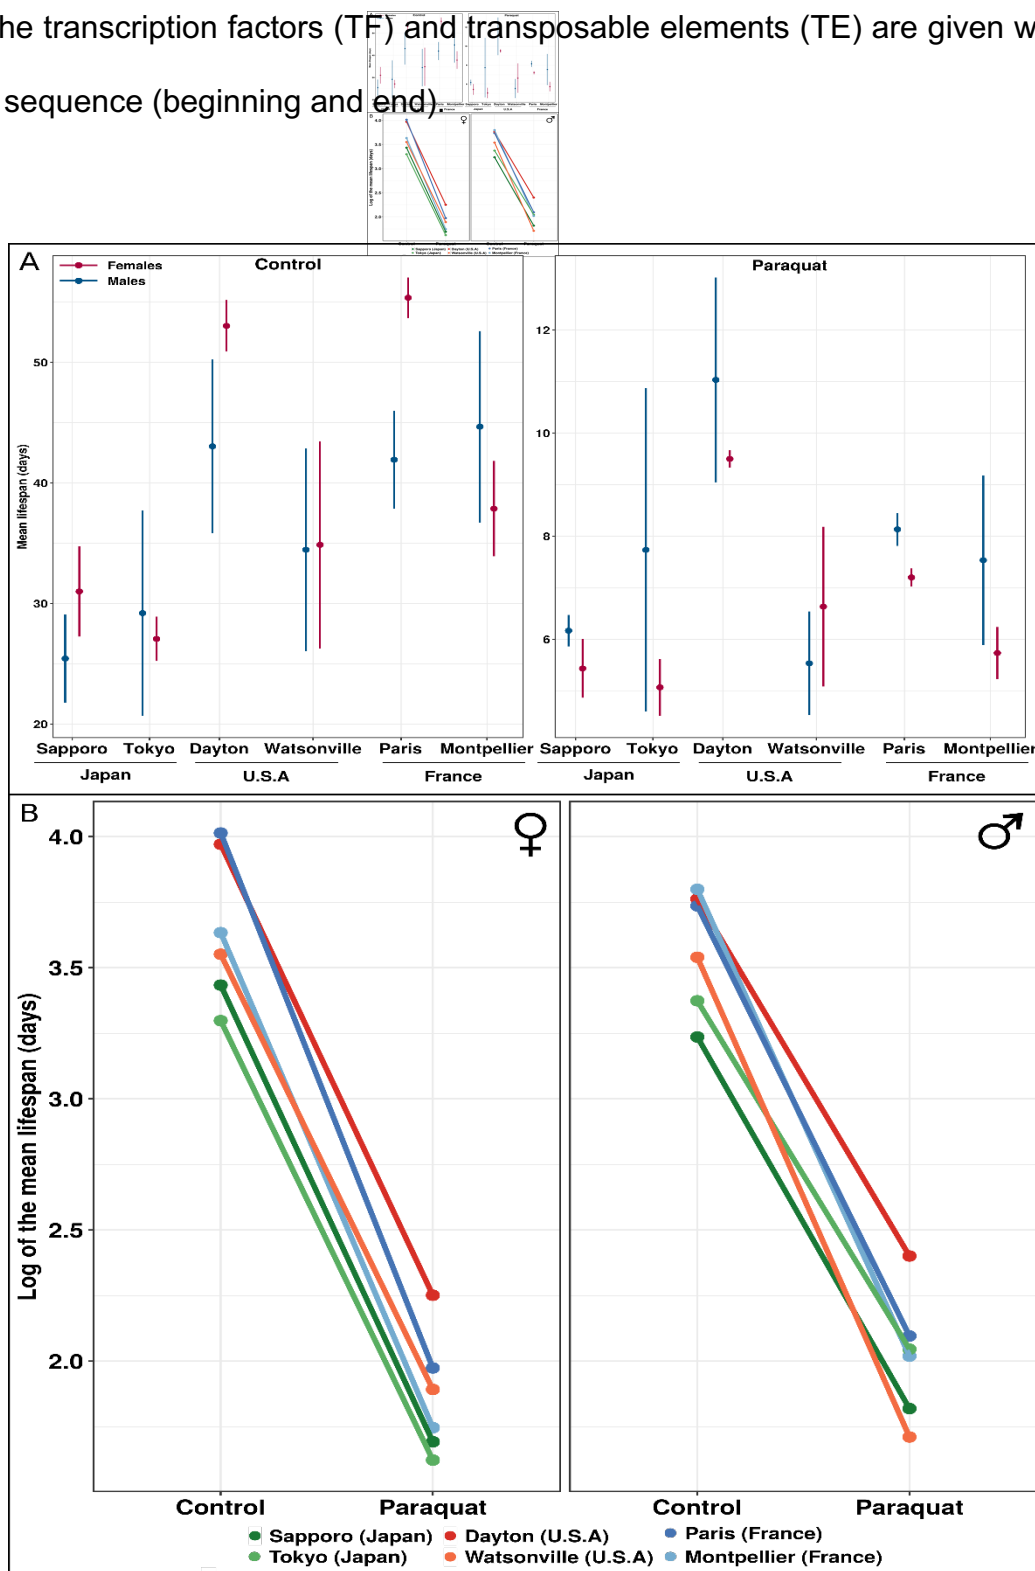

92

93

94

95 Figure 1

96

97  
98  
99  
00  
01

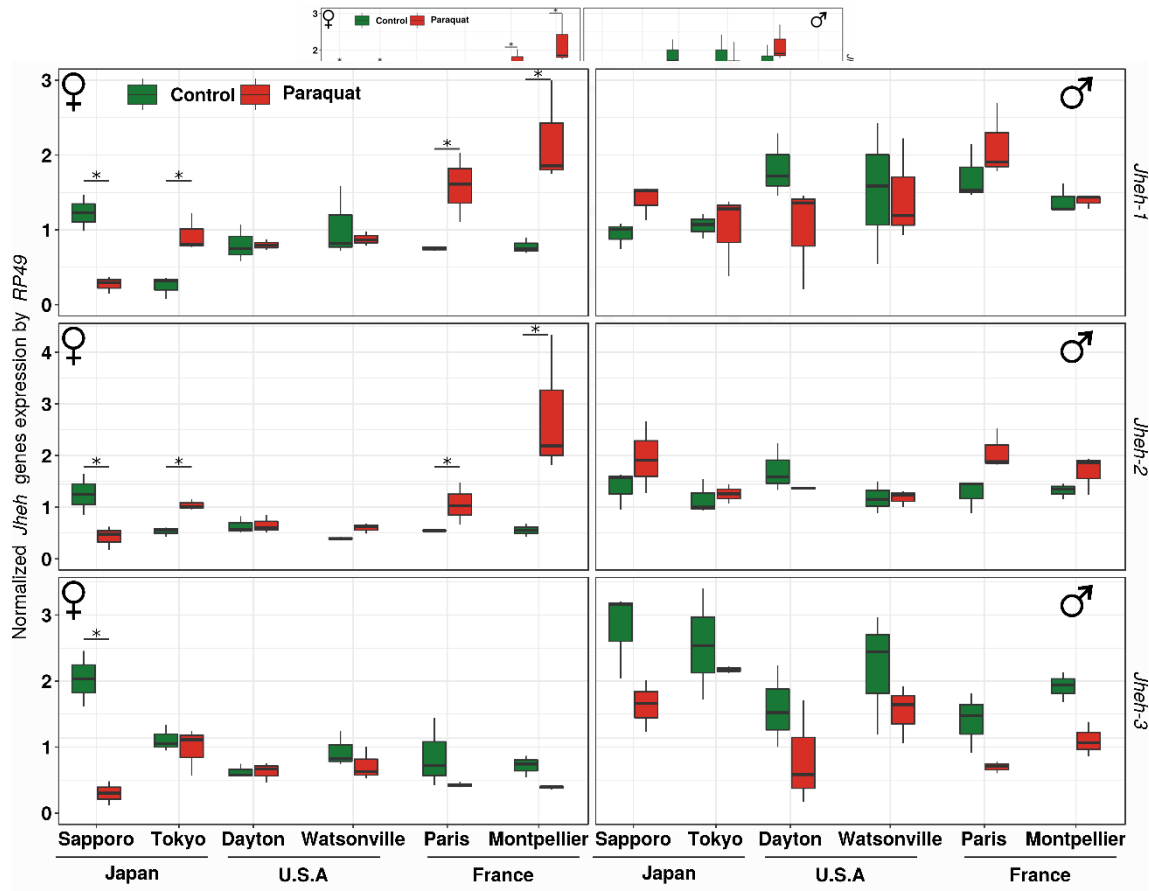

02  
03  
04  
05  
06  
07  
08  
09  
10

Figure 2



11

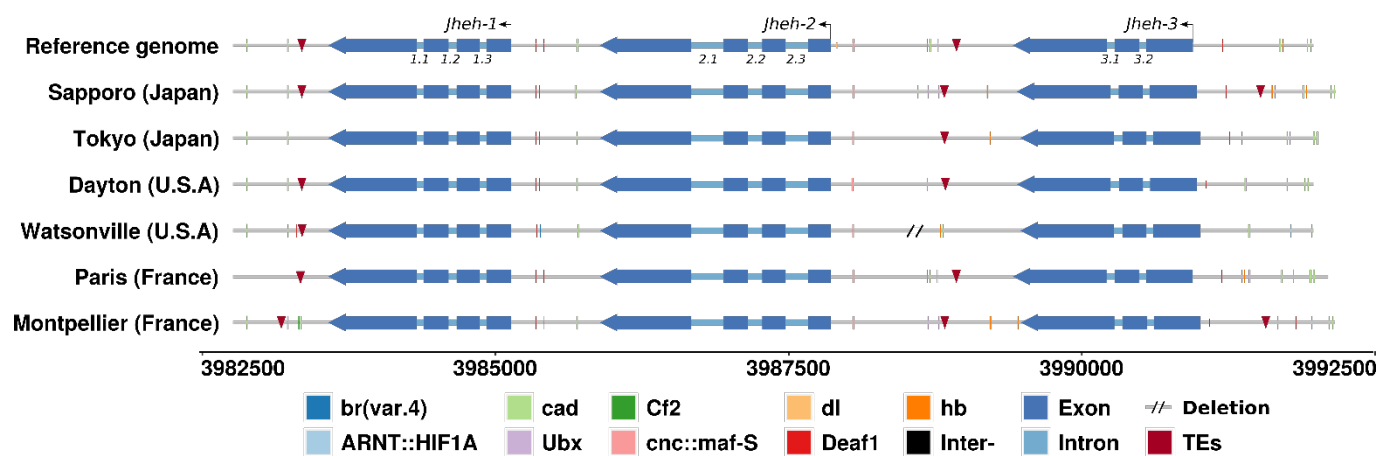

12

13

Figure 3

14

15

16

17

18

19

20

21

22

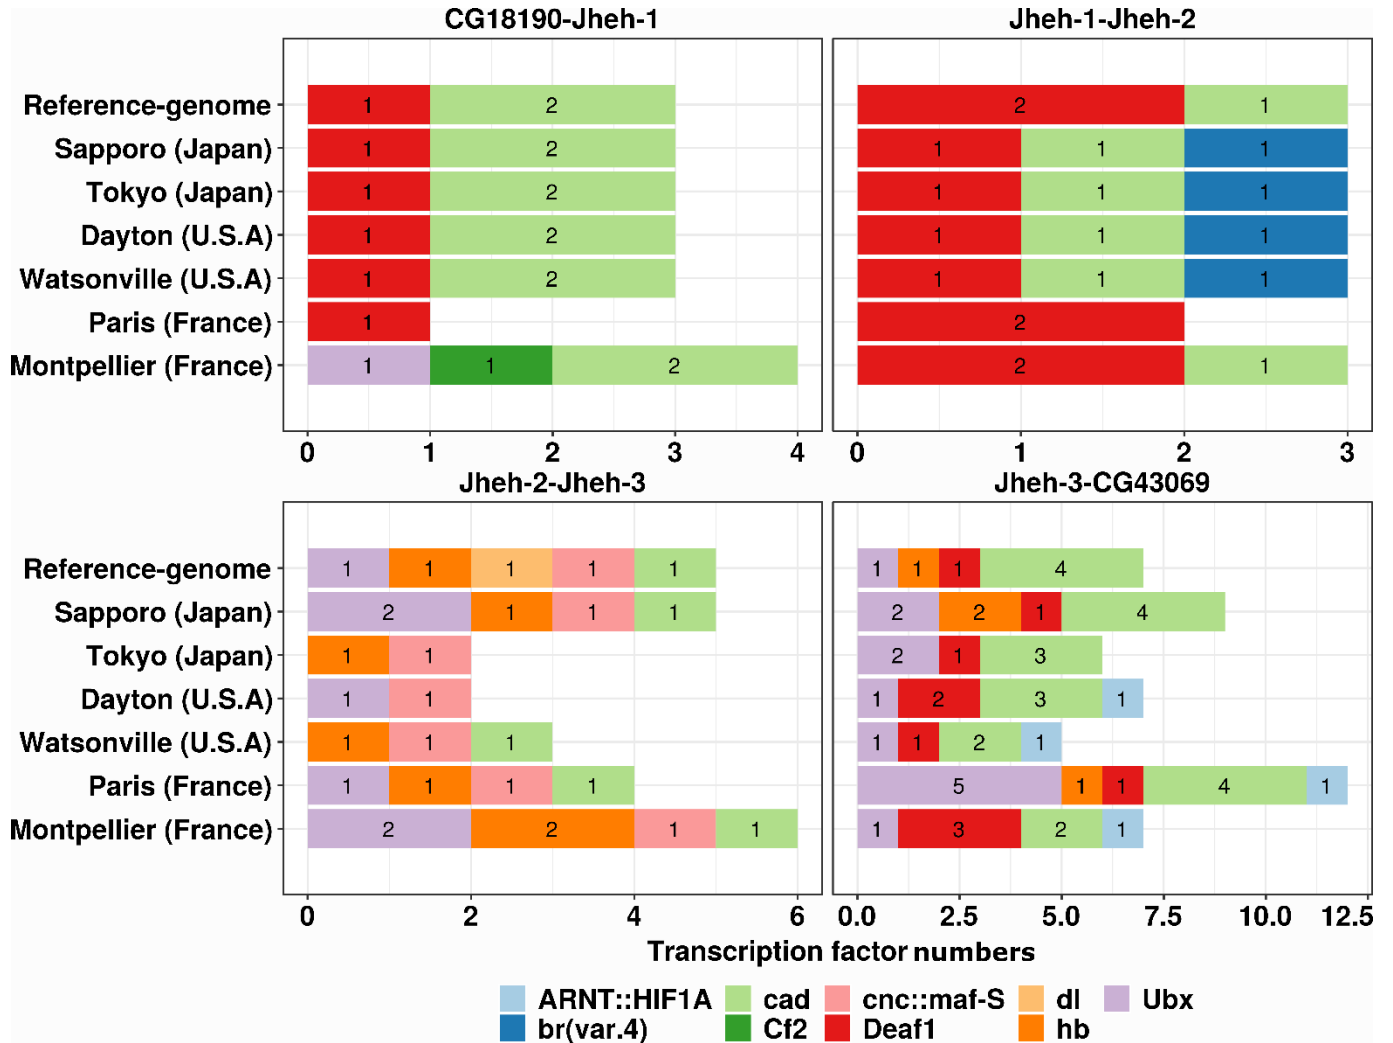

23 Figure 4

24

25

26

27

28

29

30

31

32

33

34

35

36

37

38 Table 1. **Transcription factor analyzed with the PWM matrix ID from JASPAR2018.** Mainly  
 39 matrix come from *D. melanogaster* model, but several as HSF, HIF1 and XBP1 come from human,  
 40 while MTF1 come from mice.

| Trancription factors                                         | PWM ID   | Species                | Origin                                               |
|--------------------------------------------------------------|----------|------------------------|------------------------------------------------------|
| HSF (heat shock factor)                                      | MA0486.2 | <i>Homo sapiens</i>    |                                                      |
| HIF1 (hypoxia inducible factor)                              | MA0259.1 | <i>Homo sapiens</i>    |                                                      |
| DL (Dorsal)                                                  | MA0022.1 | <i>D. melanogaster</i> |                                                      |
| MTF1 (Metal response element-binding Transcription Factor-1) | PB0044.1 | <i>Mus musculus</i>    |                                                      |
| DEAF1 (Deformed epidermal autoregulatory factor-1)           | MA0185.1 | <i>D. melanogaster</i> | From Villanueva-Cañas <i>et al.</i> (2019)           |
| CAD (caudal)                                                 | MA0216.2 | <i>D. melanogaster</i> |                                                      |
| NUB (nubbin)                                                 | MA0197.2 | <i>D. melanogaster</i> |                                                      |
| XBP1 (X box binding protein-1)                               | MA0844.1 | <i>Homo sapiens</i>    |                                                      |
| CnC (cap-n-collar)                                           | MA0530.1 | <i>D. melanogaster</i> |                                                      |
| Br(var4) (broad complex 4)                                   | MA0013.1 | <i>D. melanogaster</i> |                                                      |
| Hb (hunchbak)                                                | MA0049.1 | <i>D. melanogaster</i> |                                                      |
| Ubx (Ultrabithorax)                                          | MA0094.2 | <i>D. melanogaster</i> | From conSite website (Sandelin <i>et al.</i> , 2004) |
| Cf2 (Chorion factor 2)                                       | MA0015.1 | <i>D. melanogaster</i> |                                                      |
| Snail (sna)                                                  | MA0086.2 | <i>D. melanogaster</i> |                                                      |

41  
 42  
 43

44 Table 2. **Mean ( $\pm$ SD) survival time (days) for male and female lines of *D. suzukii* under**  
45 **control and paraquat conditions.** Sensitivity represents the exponential of the interaction values  
46 in the model (i.e., the difference in slope between the Sapporo reference and the other genotypes,  
47 see Figure S1). \* indicate a significant difference with the reference (p-value < 0.05).

| Lines                | Females         |               |             | Males           |               |             |
|----------------------|-----------------|---------------|-------------|-----------------|---------------|-------------|
|                      | Control         | Paraquat      | sensitivity | Control         | Paraquat      | sensitivity |
| Sapporo (Japan)      | 31 $\pm$ 13.3   | 5.4 $\pm$ 2.3 | 1.0         | 25.4 $\pm$ 5.9  | 6.2 $\pm$ 2.1 | 1.0         |
| Tokyo (Japan)        | 27.1 $\pm$ 9.1  | 5.1 $\pm$ 1.9 | 1.06        | 29.2 $\pm$ 11.5 | 7.7 $\pm$ 4.9 | 1.02        |
| Dayton (U.S.A)       | 53 $\pm$ 8.4    | 9.5 $\pm$ 3   | 0.98        | 42.8 $\pm$ 16.3 | 11 $\pm$ 4.1  | 1.23        |
| Watsonville (U.S.A)  | 34.9 $\pm$ 13.8 | 6.6 $\pm$ 2.3 | 1.13        | 34.5 $\pm$ 11.2 | 5.5 $\pm$ 2.1 | 0.68*       |
| Paris (France)       | 55.4 $\pm$ 9.4  | 7.2 $\pm$ 1.8 | 0.72*       | 41.9 $\pm$ 14.8 | 8.1 $\pm$ 2.8 | 0.9         |
| Montpellier (France) | 37.9 $\pm$ 8.4  | 5.7 $\pm$ 2.2 | 0.83        | 44.7 $\pm$ 12.2 | 7.5 $\pm$ 3.8 | 0.66*       |

48  
49  
50  
51  
52  
53  
54  
55  
56  
57  
58  
59  
60  
61  
62  
63  
64  
65  
66  
67  
68  
69

70 **Table 3 Within-line diversity (pi) for the six genotypes of *D. sukuzii* for the seven sequenced intronic**  
71 **regions.** The mean diversity per intron was calculated using the most common sequence of the six  
72 genotypes.

|                              | <i>Jheh-1.1</i> | <i>Jheh-1.2</i> | <i>Jheh-1.3</i> | <i>Jheh-2.1</i> | <i>Jheh-2.2</i> | <i>Jheh-2.3</i> | <i>Jheh-3.2</i> |
|------------------------------|-----------------|-----------------|-----------------|-----------------|-----------------|-----------------|-----------------|
| <b>Paris</b>                 | 0.0000          | 0.0000          | 0.0000          | 0.0460          | 0.0000          | 0.0000          | 0.0000          |
| <b>Montpellier</b>           | 0.0000          | 0.0169          | 0.0000          | 0.0502          | 0.0081          | 0.0000          | 0.0339          |
| <b>Sapporo</b>               | 0.0000          | 0.0000          | 0.0396          | 0.0546          | 0.0000          | 0.0000          | 0.0000          |
| <b>Tokyo</b>                 | 0.0000          | 0.0000          | 0.0000          | 0.0324          | 0.0000          | 0.0144          | 0.0113          |
| <b>Dayton</b>                | 0.0000          | 0.0000          | 0.0000          | 0.0449          | 0.0000          | 0.0096          | 0.0000          |
| <b>Watsonville</b>           | 0.0792          | 0.0000          | 0.0198          | 0.0466          | 0.0000          | 0.0000          | 0.0000          |
| <b>Mean pi<br/>diversity</b> | 0.0070          | 0.0080          | 0.0177          | 0.0390          | 0.0214          | 0.0333          | 0.0209          |

73

74

75

76

77

78

79

80

81

82

83

84

85

86

87

88

89

90

91

92

93

94

95

96

97

98 **Table 4. Size differences (bp) between the six genotypes and the reference genome. TE**  
 99 insertions are indicated by their size or abs if they are absent.

|             |                 | expected<br>size<br>(reference<br>genome) | Sapporo<br>(Japan) | Tokyo<br>(Japan) | Dayton<br>(U.S.A) | Watsonville<br>(U.S.A) | Paris<br>(France) | Montpellier<br>(France) |
|-------------|-----------------|-------------------------------------------|--------------------|------------------|-------------------|------------------------|-------------------|-------------------------|
| X-Jheh1     | Size            | 809                                       | 0                  | -2               | 0                 | +1                     | 0                 | +12                     |
|             | TE<br>insertion | 82                                        | 82                 | abs              | 82                | 82                     | 82                | abs                     |
| Jheh1/jheh2 | Size            | 756                                       | -17                | -6               | -2                | +2                     | +1                | +7                      |
|             | TE<br>insertion | abs                                       | abs                | abs              | abs               | abs                    | abs               | abs                     |
| Jheh2/Jheh3 | Size            | 1541                                      | +31                | -64              | +35               | -297                   | -1                | +66                     |
|             | TE<br>insertion | 41                                        | 48                 | 49               | 91                | abs                    | 41                | 49                      |
| Jheh3-Y     | Size            | 1021                                      | +171               | -8               | +58               | -55                    | +29               | +122                    |
|             | TE<br>insertion | abs                                       | 58                 | abs              | abs               | abs                    | abs               | 36                      |

00  
 01  
 02  
 03  
 04  
 05  
 06  
 07

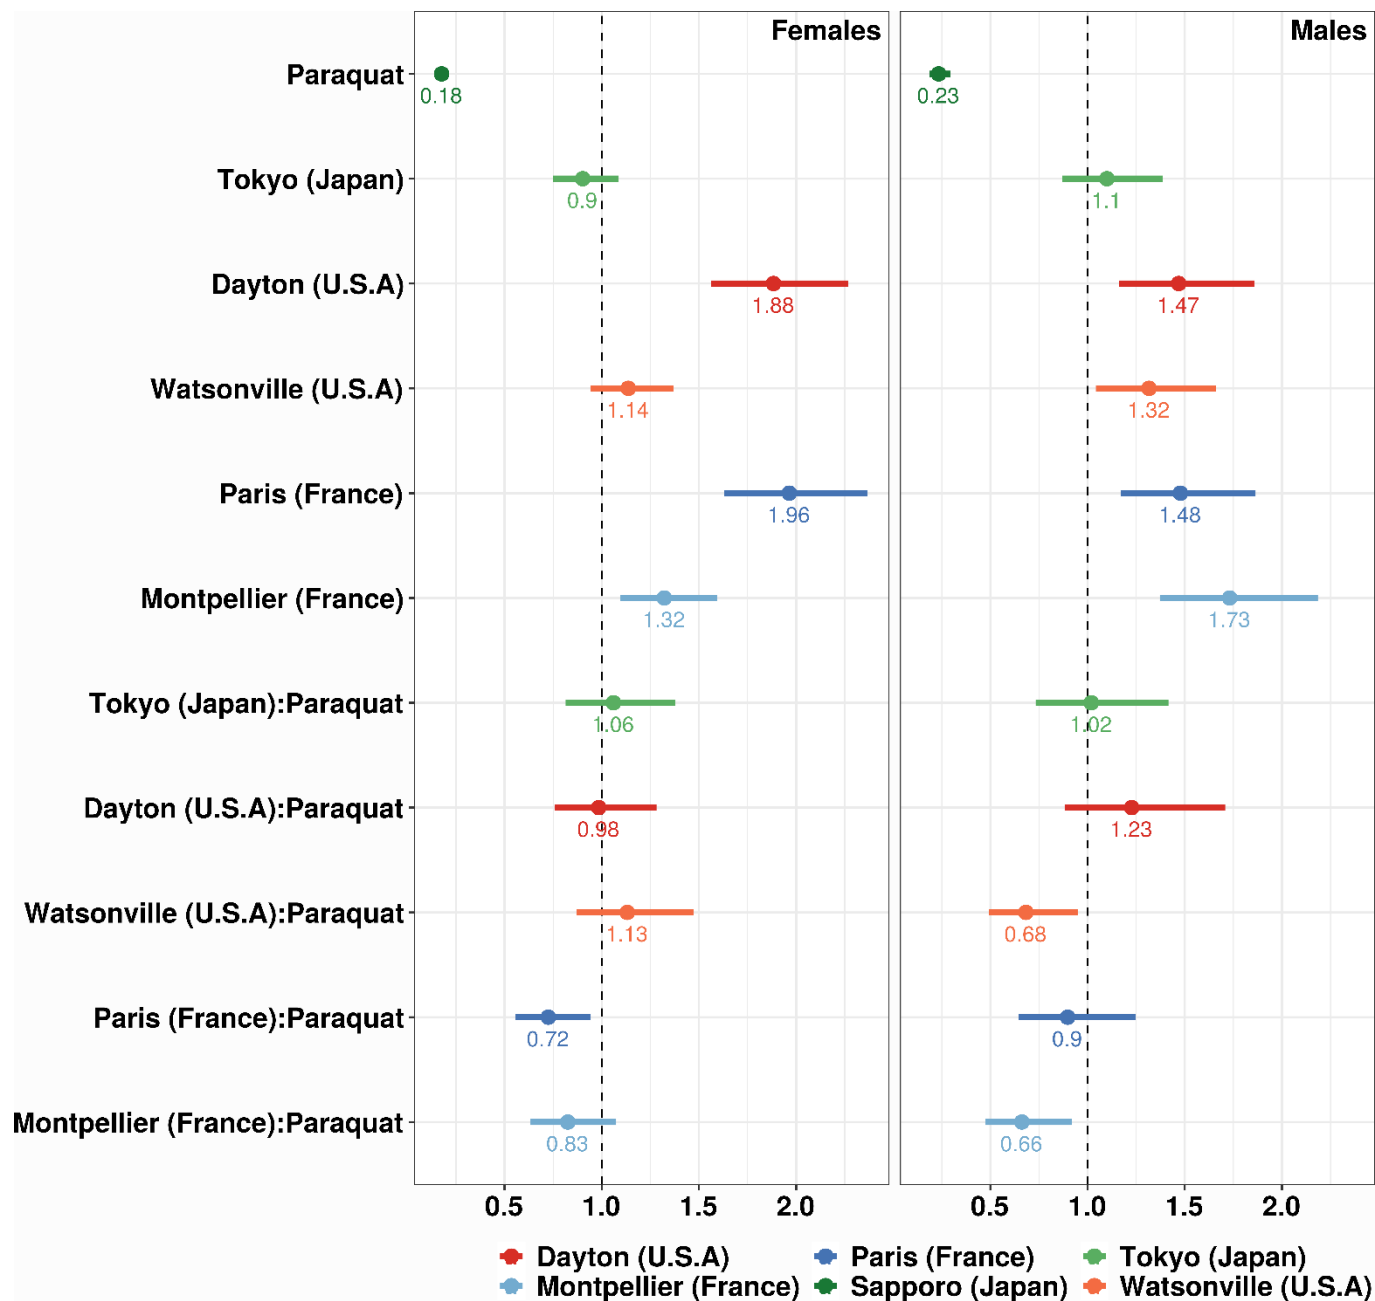

08  
09  
10

11 Fig. S1. Representation of the parameters estimated by the model for treatment, genotypes and  
 12 interactions for females (left) and males (right). Values were transformed exponentially to be  
 13 interpreted as a multiplier effect. The vertical line corresponds to the reference. Associated p-values  
 14 are greater than 0.05 when the confidence interval includes the vertical line.

15  
16

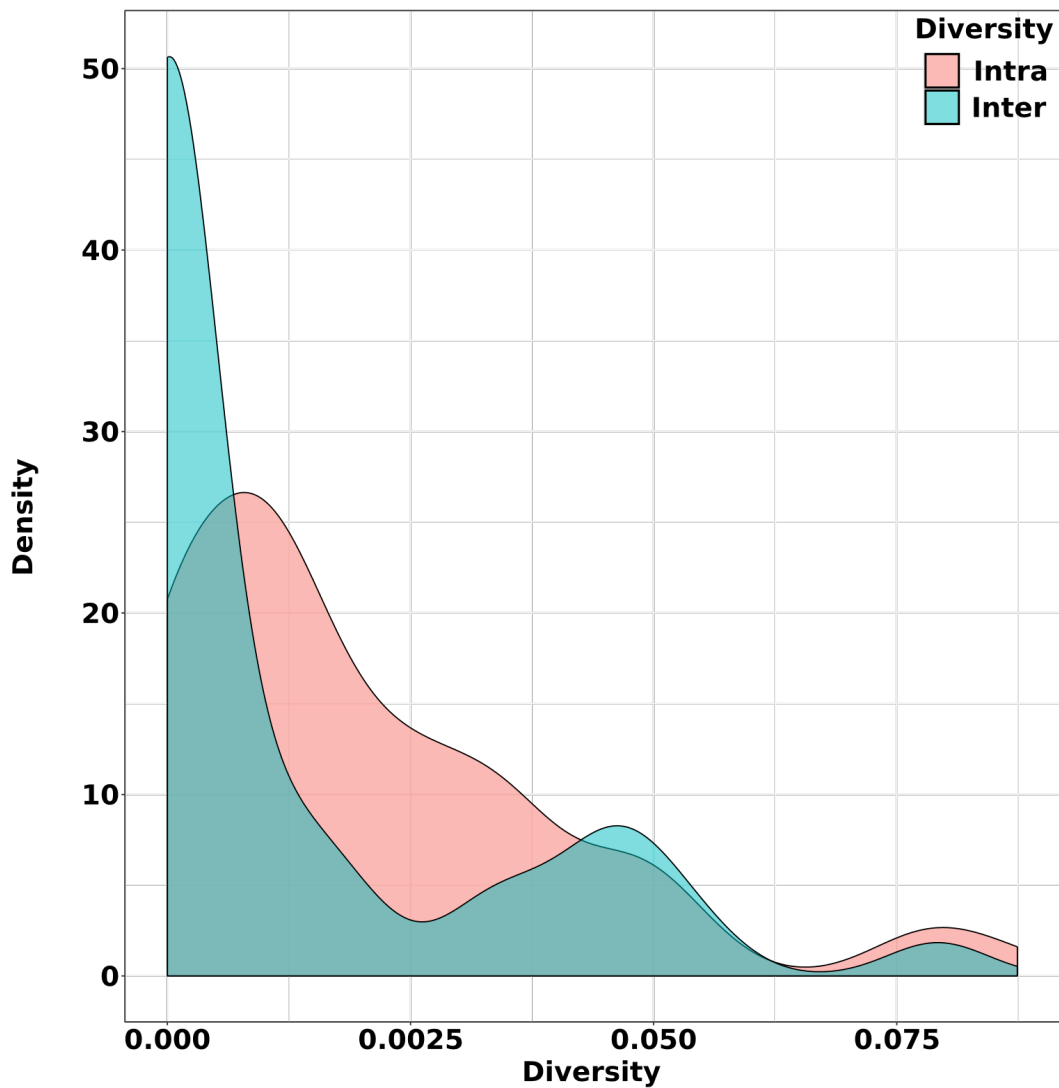

17

18 Fig. S2. Distribution of the between genotype (blue) and within genotype (pink) genetic diversity using  
19 pi values for all intronic regions.

20

21

22

23

24

25

26

27

28

29



30 Table S1. Primers used for the PCR experiments.

31

| Name                        | Sequence                                                          |
|-----------------------------|-------------------------------------------------------------------|
| <i>Jheh-1</i>               | Forward: GAGCAACCTGGACAAGAACAAC<br>Reverse: TATCCCAAGCGCTGCATAAG  |
| <i>Jheh-2</i>               | Forward: AGAAGCTGGACCACTACCAAAC<br>Reverse: AGAACCTTCTTGGGCTTCTGG |
| <i>Jheh-3</i>               | Forward: AGTACGCTTTTGAGGTCGTG<br>Reverse: AGACGCAGCATCAAGTTTCG    |
| <i>RP49</i>                 | Forward: CCGCTTCAAGGGACAGTATC<br>Reverse: GACGATCTCCTTGCGCTTCT    |
| <i>DS10_00005800-Jheh-1</i> | Forward: GTGTCCCTGGACCATGTTGT<br>Reverse: GGAGGACACTTTGCGGCTAT    |
| <i>Jheh-1-Jheh-2</i>        | Forward: GCCAATGGCCAGTACACAGA<br>Reverse: GCCCCAGAAGCTGTACGATG    |
| <i>Jheh-2-Jheh-3</i>        | Forward: GCAAAGTGAGCATGATTTGGC<br>Reverse: CAACCCTGTGAACCGAGCTA   |
| <i>DS10_0005804-Jheh-3</i>  | Forward: GCAATTAGCTCCCACTCGGT<br>Reverse: CGTGACACTGCAGTTTATGGC   |
| <i>Jheh-1_intr1</i>         | Forward: GAGCGGATCCTAGACCCTTC<br>Reverse: GCTGGTCGGAGGTAAGTTGT    |
| <i>Jheh-1_intr2</i>         | Forward: AAGAAAGTGCATGCGTAGCC<br>Reverse: TGGCAGTTCAACCACTTCAC    |
| <i>Jheh-1_intr3</i>         | Forward: ATTGAGGCGGCTCTTTAGGT<br>Reverse: CGGAGGTGATAAACAACAACTT  |
| <i>Jheh-2_intr1</i>         | Forward: GAGGCCTGGAATTGGAAAAT<br>Reverse: TCTCGAGGGAATAAGAGGTTCA  |
| <i>Jheh-2_intr2</i>         | Forward: CGGCTTGGCATGAATAAAGT<br>Reverse: ACGGAGATCCAGGGGTAAGT    |
| <i>Jheh-2_intr3</i>         | Forward: CCTCAATTACCTGTGGGGTAAA<br>Reverse: CCCGAGGTAAGCTATGTTTCA |
| <i>Jheh-3_intr2</i>         | Forward: GCCTTCTCGTGAACGTAGTGA<br>Reverse: CAAGCAGTACACGACCGAGA   |

32

33

34

35

36

37

38 Table S2. **Genotypes of *D. suzukii* with the number of haplotypes obtained.** The length of  
 39 the sequence corresponds to the size of the amplified fragment used to calculate the average  
 40 diversity per population per intron. The mean diversity was calculated as the average between  
 41 the most common haplotypes of the 6 lines.  
 42

| Lineage              | Jheh-1 intron 1 |            |                       |                |
|----------------------|-----------------|------------|-----------------------|----------------|
|                      | # of haplotypes | # of flies | Size of the alignment | Mean diversity |
| Paris (France)       | 1               | 6          | 97pb                  | 0.0070         |
| Montpellier (France) | 1               | 10         |                       |                |
| Sapporo Japan)       | 1               | 6          |                       |                |
| Tokyo (Japan)        | 1               | 10         |                       |                |
| Dayton (U.S.A)       | 1               | 10         |                       |                |
| Watsonville (U.S.A)  | 2               | 7-2        |                       |                |
|                      | Jheh-1 intron 2 |            |                       |                |
|                      | N haplotype     | N          | Alignment             | Mean diversity |
| Paris (France)       | 1               | 10         | 119pb                 | 0.0080         |
| Montpellier (France) | 2               | 4-3        |                       |                |
| Sapporo Japan)       | 1               | 10         |                       |                |
| Tokyo (Japan)        | 1               | 10         |                       |                |
| Dayton (U.S.A)       | 1               | 10         |                       |                |
| Watsonville (U.S.A)  | 1               | 10         |                       |                |
|                      | Jheh-1 intron 3 |            |                       |                |
|                      | N haplotype     | N          | Alignment             | Mean diversity |

|                         |             |                 |           |                |
|-------------------------|-------------|-----------------|-----------|----------------|
| Paris (France)          | 1           | 10              | 133pb     | 0.0177         |
| Montpellier<br>(France) | 1           | 10              |           |                |
| Sapporo Japan)          | 2           | 7-2             |           |                |
| Tokyo (Japan)           | 1           | 10              |           |                |
| Dayton (U.S.A)          | 1           | 10              |           |                |
| Watsonville<br>(U.S.A)  | 2           | 5-5             |           |                |
|                         |             | Jheh-2 intron 1 |           |                |
|                         | N haplotype | N               | Alignment | Mean diversity |
| Paris (France)          | 2           | 4-2             | 250pb     | 0.0390         |
| Montpellier<br>(France) | 2           | 5-2             |           |                |
| Sapporo Japan)          | 2           | 4-3             |           |                |
| Tokyo (Japan)           | 4           | 2-2-1-1         |           |                |
| Dayton (U.S.A)          | 3           | 4-2-1           |           |                |
| Watsonville<br>(U.S.A)  | 2           | 5-4             |           |                |
|                         |             | Jheh-2 intron 2 |           |                |
|                         | N haplotype | N               | Alignment | Mean diversity |
| Paris (France)          | 1           | 8               | 165pb     | 0.0214         |
| Montpellier<br>(France) | 3           | 4-3-2           |           |                |
| Sapporo Japan)          | 1           | 10              |           |                |
| Tokyo (Japan)           | 1           | 8               |           |                |

|                         |             |                        |           |                |
|-------------------------|-------------|------------------------|-----------|----------------|
| Dayton (U.S.A)          | 1           | 9                      |           |                |
| Watsonville<br>(U.S.A)  | 1           | 10                     |           |                |
|                         |             | <b>Jheh-2 intron 3</b> |           |                |
|                         | N haplotype | N                      | Alignment | Mean diversity |
| Paris (France)          | 1           | 8                      | 211pb     | 0.0333         |
| Montpellier<br>(France) | 1           | 8                      |           |                |
| Sapporo Japan)          | 1           | 10                     |           |                |
| Tokyo (Japan)           | 2           | 5-4                    |           |                |
| Dayton (U.S.A)          | 2           | 4-2                    |           |                |
| Watsonville<br>(U.S.A)  | 1           | 10                     |           |                |
|                         |             | <b>Jheh-3 intron 2</b> |           |                |
|                         | N haplotype | N                      | Alignment | Mean diversity |
| Paris (France)          | 1           | 10                     | 118pb     | 0.0209         |
| Montpellier<br>(France) | 2           | 7-3                    |           |                |
| Sapporo Japan)          | 1           | 9                      |           |                |
| Tokyo (Japan)           | 3           | 7-2-1                  |           |                |
| Dayton (U.S.A)          | 1           | 9                      |           |                |
| Watsonville<br>(U.S.A)  | 1           | 10                     |           |                |

43

44 Table S3. Pairwise genetic distance between genotypes. Bold values represent genetic diversity within  
45 lines.

46

| <b>Jheh-1.1</b> | <b>Paris</b>  | <b>Montpellier</b> | <b>Sapporo</b> | <b>Tokyo</b>  | <b>Dayton</b> | <b>Watsonville</b> |
|-----------------|---------------|--------------------|----------------|---------------|---------------|--------------------|
| Paris           | <b>0.0000</b> |                    |                |               |               |                    |
| Montpellier     | 0.0104        | <b>0.0000</b>      |                |               |               |                    |
| Sapporo         | 0.0104        | 0.0000             | <b>0.0000</b>  |               |               |                    |
| Tokyo           | 0.0208        | 0.0104             | 0.0104         | <b>0.0000</b> |               |                    |
| Dayton          | 0.0105        | 0.0000             | 0.0000         | 0.0105        | <b>0.0000</b> |                    |
| Watsonville     | 0.0104        | 0.0000             | 0.0000         | 0.0104        | 0.0000        | <b>0.0792</b>      |
| <b>Jheh-1.2</b> | <b>Paris</b>  | <b>Montpellier</b> | <b>Sapporo</b> | <b>Tokyo</b>  | <b>Dayton</b> | <b>Watsonville</b> |
| Paris           | <b>0.0000</b> |                    |                |               |               |                    |
| Montpellier     | 0.0084        | <b>0.0169</b>      |                |               |               |                    |
| Sapporo         | 0.0000        | 0.0084             | <b>0.0000</b>  |               |               |                    |
| Tokyo           | 0.0000        | 0.0084             | 0.0000         | <b>0.0000</b> |               |                    |
| Dayton          | 0.0000        | 0.0084             | 0.0000         | 0.0000        | <b>0.0000</b> |                    |
| Watsonville     | 0.0000        | 0.0084             | 0.0000         | 0.0000        | 0.0000        | <b>0.0000</b>      |
| <b>Jheh-1.3</b> | <b>Paris</b>  | <b>Montpellier</b> | <b>Sapporo</b> | <b>Tokyo</b>  | <b>Dayton</b> | <b>Watsonville</b> |
| Paris           | <b>0.0000</b> |                    |                |               |               |                    |
| Montpellier     | 0.0079        | <b>0.0000</b>      |                |               |               |                    |
| Sapporo         | 0.0157        | 0.0236             | <b>0.0396</b>  |               |               |                    |
| Tokyo           | 0.0079        | 0.0000             | 0.0236         | <b>0.0000</b> |               |                    |
| Dayton          | 0.0238        | 0.0159             | 0.0379         | 0.0159        | <b>0.0000</b> |                    |
| Watsonville     | 0.0236        | 0.0157             | 0.0226         | 0.0157        | 0.0152        | <b>0.0198</b>      |
| <b>Jheh-2.1</b> | <b>Paris</b>  | <b>Montpellier</b> | <b>Sapporo</b> | <b>Tokyo</b>  | <b>Dayton</b> | <b>Watsonville</b> |
| Paris           | <b>0.0460</b> |                    |                |               |               |                    |
| Montpellier     | 0.0502        | <b>0.0502</b>      |                |               |               |                    |
| Sapporo         | 0.0546        | 0.0462             | <b>0.0546</b>  |               |               |                    |
| Tokyo           | 0.0502        | 0.0167             | 0.0378         | <b>0.0324</b> |               |                    |

|                 |               |                    |                |               |               |                    |
|-----------------|---------------|--------------------|----------------|---------------|---------------|--------------------|
| Dayton          | 0.0254        | 0.0466             | 0.0511         | 0.0466        | <b>0.0449</b> |                    |
| Watsonville     | 0.0502        | 0.0084             | 0.0462         | 0.0084        | 0.0466        | <b>0.0466</b>      |
| <b>Jheh-2.2</b> | <b>Paris</b>  | <b>Montpellier</b> | <b>Sapporo</b> | <b>Tokyo</b>  | <b>Dayton</b> | <b>Watsonville</b> |
| Paris           | <b>0.0000</b> |                    |                |               |               |                    |
| Montpellier     | 0.0121        | <b>0.0081</b>      |                |               |               |                    |
| Sapporo         | 0.0303        | 0.0303             | <b>0.0000</b>  |               |               |                    |
| Tokyo           | 0.0061        | 0.0061             | 0.0242         | <b>0.0000</b> |               |                    |
| Dayton          | 0.0364        | 0.0364             | 0.0242         | 0.0303        | <b>0.0000</b> |                    |
| Watsonville     | 0.0000        | 0.0121             | 0.0303         | 0.0061        | 0.0364        | <b>0.0000</b>      |
| <b>Jheh-2.3</b> | <b>Paris</b>  | <b>Montpellier</b> | <b>Sapporo</b> | <b>Tokyo</b>  | <b>Dayton</b> | <b>Watsonville</b> |
| Paris           | <b>0.0000</b> |                    |                |               |               |                    |
| Montpellier     | 0.0240        | <b>0.0000</b>      |                |               |               |                    |
| Sapporo         | 0.0144        | 0.0096             | <b>0.0000</b>  |               |               |                    |
| Tokyo           | 0.0144        | 0.0096             | 0.0000         | <b>0.0144</b> |               |                    |
| Dayton          | 0.0144        | 0.0096             | 0.0000         | 0.0000        | <b>0.0096</b> |                    |
| Watsonville     | 0.0825        | 0.0874             | 0.0777         | 0.0777        | 0.0777        | <b>0.0000</b>      |
| <b>Jheh-3.2</b> | <b>Paris</b>  | <b>Montpellier</b> | <b>Sapporo</b> | <b>Tokyo</b>  | <b>Dayton</b> | <b>Watsonville</b> |
| Paris           | <b>0.0000</b> |                    |                |               |               |                    |
| Montpellier     | 0.0339        | <b>0.0339</b>      |                |               |               |                    |
| Sapporo         | 0.0254        | 0.0085             | <b>0.0000</b>  |               |               |                    |
| Tokyo           | 0.0339        | 0.0169             | 0.0085         | <b>0.0113</b> |               |                    |
| Dayton          | 0.0000        | 0.0339             | 0.0254         | 0.0339        | <b>0.0000</b> |                    |
| Watsonville     | 0.0339        | 0.0169             | 0.0085         | 0.0000        | 0.0339        | <b>0.0000</b>      |

47

48 **Table S4. Summary of the ANOVA 2 by gene and sex.**

49

50

51

| Gene          | Sex     | Estimate           | Df | Sum Sq    | Mean Sq   | F value    | Pr(>F)    |
|---------------|---------|--------------------|----|-----------|-----------|------------|-----------|
| <i>Jheh-1</i> | Females | Treatment          | 1  | 0.7578741 | 0.7578741 | 5.4488993  | 0.0286769 |
|               |         | Genotype           | 5  | 5.7726966 | 1.1545393 | 8.3008099  | 0.0001334 |
|               |         | Treatment:Genotype | 5  | 7.6349146 | 1.5269829 | 10.9785737 | 0.0000172 |
|               |         | Residuals          | 23 | 3.1990137 | 0.1390876 | NA         | NA        |
|               | Males   | Treatment          | 1  | 0.0375774 | 0.0375774 | 0.1612375  | 0.6915729 |
|               |         | Genotype           | 5  | 1.5806168 | 0.3161234 | 1.3564255  | 0.2754043 |
|               |         | Treatment:Genotype | 5  | 1.4780750 | 0.2956150 | 1.2684280  | 0.3096968 |
|               |         | Residuals          | 24 | 5.5933488 | 0.2330562 | NA         | NA        |
| <i>Jheh-2</i> | Females | Treatment          | 1  | 1.3696002 | 1.3696002 | 13.3644443 | 0.0013171 |
|               |         | Genotype           | 5  | 2.7850846 | 0.5570169 | 5.4353244  | 0.0019155 |
|               |         | Treatment:Genotype | 5  | 5.2867104 | 1.0573421 | 10.3174554 | 0.0000276 |
|               |         | Residuals          | 23 | 2.3570606 | 0.1024809 | NA         | NA        |
|               | Males   | Treatment          | 1  | 0.2389486 | 0.2389486 | 4.2568387  | 0.0500705 |
|               |         | Genotype           | 5  | 0.6101519 | 0.1220304 | 2.1739557  | 0.0908517 |
|               |         | Treatment:Genotype | 5  | 0.4690600 | 0.0938120 | 1.6712490  | 0.1799009 |
|               |         | Residuals          | 24 | 1.3471889 | 0.0561329 | NA         | NA        |
| <i>Jheh-3</i> | Females | Treatment          | 1  | 2.8083330 | 2.8083330 | 21.6508485 | 0.0001105 |
|               |         | Genotype           | 5  | 1.8020725 | 0.3604145 | 2.7786163  | 0.0417902 |
|               |         | Treatment:Genotype | 5  | 3.4117019 | 0.6823404 | 5.2605045  | 0.0022994 |
|               |         | Residuals          | 23 | 2.9833315 | 0.1297101 | NA         | NA        |
|               | Males   | Treatment          | 1  | 2.5825122 | 2.5825122 | 13.5076975 | 0.0011917 |
|               |         | Genotype           | 5  | 4.5987363 | 0.9197473 | 4.8106909  | 0.0034625 |
|               |         | Treatment:Genotype | 5  | 0.6865256 | 0.1373051 | 0.7181674  | 0.6161005 |
|               |         | Residuals          | 24 | 4.5885164 | 0.1911882 | NA         | NA        |

52  
53  
54

55 Table S5. **TFBS and TE detected in all six genotypes and the reference genome of *D.***  
56 ***suzukii***. We screened TFBS in the intergenic regions before, between and after the Jheh genes.  
57 The names of the transcription factors (TF) and transposable elements (TE) are given with their  
58 positions in the sequence (beginning and end).

| Genotype                | Gene           | subgene                                                   | Element | Start   | end     |
|-------------------------|----------------|-----------------------------------------------------------|---------|---------|---------|
| Dayton<br>(U.S.A)       | CG18190-Jheh-1 | RLX-<br>incomp_Blc1935_Dsuz-<br>L-B2033-<br>Map1_reversed | TE      | 3983310 | 3983388 |
| Montpellier<br>(France) | CG18190-Jheh-1 | RXX_Blc1636_Dsuz-B-<br>R3220-<br>Map20_reversed           | TE      | 3983164 | 3983184 |
| Paris<br>(France)       | CG18190-Jheh-1 | RLX-<br>incomp_Blc1935_Dsuz-<br>L-B2033-<br>Map1_reversed | TE      | 3983310 | 3983388 |
| Reference<br>genome     | CG18190-Jheh-1 | RLX-<br>incomp_Blc1935_Dsuz-<br>L-B2033-<br>Map1_reversed | TE      | 3983310 | 3983388 |
| Sapporo<br>(Japan)      | CG18190-Jheh-1 | RLX-<br>incomp_Blc1935_Dsuz-<br>L-B2033-<br>Map1_reversed | TE      | 3983310 | 3983388 |
| Tokyo<br>(Japan)        | CG18190-Jheh-1 | RXX-<br>LARD_Blc2842_Dsuz-<br>L-B3109-<br>Map1_reversed   | TE      | 3983339 | 3983380 |
| Watsonville<br>(U.S.A)  | CG18190-Jheh-1 | RLX-<br>incomp_Blc1935_Dsuz-<br>L-B2033-<br>Map1_reversed | TE      | 3983312 | 3983390 |
| Dayton<br>(U.S.A)       | Jheh-2-Jheh-3  | RXX-<br>LARD_Blc2479_Dsuz-<br>L-B2652-Map1                | TE      | 3988791 | 3988881 |
| Montpellier<br>(France) | Jheh-2-Jheh-3  | RXX-<br>LARD_Blc2479_Dsuz-<br>L-B2652-Map1                | TE      | 3988807 | 3988855 |
| Paris<br>(France)       | Jheh-2-Jheh-3  | RLX-incomp-<br>chim_Blc427_Dsuz-L-<br>B425-Map1           | TE      | 3988909 | 3988949 |
| Reference<br>genome     | Jheh-2-Jheh-3  | RLX-incomp-<br>chim_Blc427_Dsuz-L-<br>B425-Map1           | TE      | 3988910 | 3988950 |
| Sapporo<br>(Japan)      | Jheh-2-Jheh-3  | RXX-<br>LARD_Blc2479_Dsuz-<br>L-B2652-Map1                | TE      | 3988804 | 3988850 |
| Tokyo<br>(Japan)        | Jheh-2-Jheh-3  | RXX-<br>LARD_Blc2479_Dsuz-<br>L-B2652-Map1                | TE      | 3988805 | 3988853 |
| Dayton<br>(U.S.A)       | Jheh-3-CG43069 | RXX-<br>LARD_Blc5020_Dsuz-<br>L-B5102-Map1                | TE      | 3991489 | 3991526 |
| Montpellier<br>(France) | Jheh-3-CG43069 | RXX-<br>LARD_Blc4946_Dsuz-<br>L-B5036-Map1                | TE      | 3991470 | 3991507 |
| Reference<br>genome     | Jheh-3-CG43069 | RXX-LARD-<br>chim_Blc2440_Dsuz-L-                         | TE      | 3991670 | 3991701 |



| B2608-Map1           |                |                                              |    |         |         |
|----------------------|----------------|----------------------------------------------|----|---------|---------|
| Sapporo (Japan)      | Jheh-3-CG43069 | RXX-<br>incomp_Blc4021_Dsuz-<br>L-B4274-Map1 | TE | 3991449 | 3991507 |
| Tokyo (Japan)        | Jheh-3-CG43069 | DHX-<br>incomp_Blc652_Dsuz-<br>B-R2897-Map20 | TE | 3991666 | 3991691 |
| Watsonville (U.S.A)  | Jheh-3-CG43069 | RXX_Blc2359_Dsuz-B-<br>R8146-Map6_reversed   | TE | 3991575 | 3991608 |
| Paris (France)       | Jheh-3-CG43069 | RXX-<br>LARD_Blc434_Dsuz-L-<br>B429-Map1     | TE | 3991559 | 3991592 |
| Dayton (U.S.A)       | CG18190-Jheh-1 | cad                                          | TF | 3983223 | 3983233 |
| Dayton (U.S.A)       | CG18190-Jheh-1 | cad                                          | TF | 3982874 | 3982884 |
| Dayton (U.S.A)       | CG18190-Jheh-1 | Deaf1                                        | TF | 3983298 | 3983303 |
| Montpellier (France) | CG18190-Jheh-1 | cad                                          | TF | 3983335 | 3983345 |
| Montpellier (France) | CG18190-Jheh-1 | cad                                          | TF | 3982874 | 3982884 |
| Montpellier (France) | CG18190-Jheh-1 | Ubx                                          | TF | 3983223 | 3983230 |
| Montpellier (France) | CG18190-Jheh-1 | Cf2                                          | TF | 3983319 | 3983328 |
| Paris (France)       | CG18190-Jheh-1 | Deaf1                                        | TF | 3983298 | 3983303 |
| Reference genome     | CG18190-Jheh-1 | cad                                          | TF | 3983223 | 3983233 |
| Reference genome     | CG18190-Jheh-1 | cad                                          | TF | 3982874 | 3982884 |
| Reference genome     | CG18190-Jheh-1 | Deaf1                                        | TF | 3983298 | 3983303 |
| Sapporo (Japan)      | CG18190-Jheh-1 | cad                                          | TF | 3983223 | 3983233 |
| Sapporo (Japan)      | CG18190-Jheh-1 | cad                                          | TF | 3982874 | 3982884 |
| Sapporo (Japan)      | CG18190-Jheh-1 | Deaf1                                        | TF | 3983298 | 3983303 |
| Tokyo (Japan)        | CG18190-Jheh-1 | cad                                          | TF | 3983223 | 3983233 |
| Tokyo (Japan)        | CG18190-Jheh-1 | cad                                          | TF | 3982874 | 3982884 |
| Tokyo (Japan)        | CG18190-Jheh-1 | Deaf1                                        | TF | 3983298 | 3983303 |
| Watsonville (U.S.A)  | CG18190-Jheh-1 | cad                                          | TF | 3983225 | 3983235 |
| Watsonville (U.S.A)  | CG18190-Jheh-1 | cad                                          | TF | 3982874 | 3982884 |
| Watsonville (U.S.A)  | CG18190-Jheh-1 | Deaf1                                        | TF | 3983300 | 3983305 |
| Dayton               | Jheh-1-Jheh-2  | cad                                          | TF | 3985692 | 3985702 |

|                         |               |            |    |         |         |  |
|-------------------------|---------------|------------|----|---------|---------|--|
| (U.S.A)                 |               |            |    |         |         |  |
| Dayton<br>(U.S.A)       | Jheh-1-Jheh-2 | Deaf1      | TF | 3985342 | 3985347 |  |
| Dayton<br>(U.S.A)       | Jheh-1-Jheh-2 | br(var.4)  | TF | 3985371 | 3985381 |  |
| Montpellier<br>(France) | Jheh-1-Jheh-2 | cad        | TF | 3985692 | 3985702 |  |
| Montpellier<br>(France) | Jheh-1-Jheh-2 | Deaf1      | TF | 3985341 | 3985346 |  |
| Montpellier<br>(France) | Jheh-1-Jheh-2 | Deaf1      | TF | 3985407 | 3985412 |  |
| Paris<br>(France)       | Jheh-1-Jheh-2 | Deaf1      | TF | 3985342 | 3985347 |  |
| Paris<br>(France)       | Jheh-1-Jheh-2 | Deaf1      | TF | 3985408 | 3985413 |  |
| Reference<br>genome     | Jheh-1-Jheh-2 | cad        | TF | 3985694 | 3985704 |  |
| Reference<br>genome     | Jheh-1-Jheh-2 | Deaf1      | TF | 3985343 | 3985348 |  |
| Reference<br>genome     | Jheh-1-Jheh-2 | Deaf1      | TF | 3985409 | 3985414 |  |
| Sapporo<br>(Japan)      | Jheh-1-Jheh-2 | cad        | TF | 3985680 | 3985690 |  |
| Sapporo<br>(Japan)      | Jheh-1-Jheh-2 | Deaf1      | TF | 3985341 | 3985346 |  |
| Sapporo<br>(Japan)      | Jheh-1-Jheh-2 | br(var.4)  | TF | 3985370 | 3985380 |  |
| Tokyo<br>(Japan)        | Jheh-1-Jheh-2 | cad        | TF | 3985691 | 3985701 |  |
| Tokyo<br>(Japan)        | Jheh-1-Jheh-2 | Deaf1      | TF | 3985341 | 3985346 |  |
| Tokyo<br>(Japan)        | Jheh-1-Jheh-2 | br(var.4)  | TF | 3985370 | 3985380 |  |
| Watsonville<br>(U.S.A)  | Jheh-1-Jheh-2 | cad        | TF | 3985700 | 3985710 |  |
| Watsonville<br>(U.S.A)  | Jheh-1-Jheh-2 | Deaf1      | TF | 3985350 | 3985355 |  |
| Watsonville<br>(U.S.A)  | Jheh-1-Jheh-2 | br(var.4)  | TF | 3985379 | 3985389 |  |
| Dayton<br>(U.S.A)       | Jheh-2-Jheh-3 | cnc::maf-S | TF | 3988041 | 3988055 |  |
| Dayton<br>(U.S.A)       | Jheh-2-Jheh-3 | Ubx        | TF | 3988678 | 3988685 |  |
| Montpellier<br>(France) | Jheh-2-Jheh-3 | cad        | TF | 3989450 | 3989460 |  |
| Montpellier<br>(France) | Jheh-2-Jheh-3 | cnc::maf-S | TF | 3988043 | 3988057 |  |
| Montpellier<br>(France) | Jheh-2-Jheh-3 | hb         | TF | 3989217 | 3989226 |  |
| Montpellier<br>(France) | Jheh-2-Jheh-3 | hb         | TF | 3989452 | 3989461 |  |
| Montpellier<br>(France) | Jheh-2-Jheh-3 | Ubx        | TF | 3988684 | 3988691 |  |

|                         |                |             |    |         |         |
|-------------------------|----------------|-------------|----|---------|---------|
| Montpellier<br>(France) | Jheh-2-Jheh-3  | Ubx         | TF | 3988777 | 3988784 |
| Paris<br>(France)       | Jheh-2-Jheh-3  | cad         | TF | 3988701 | 3988711 |
| Paris<br>(France)       | Jheh-2-Jheh-3  | cnc::maf-S  | TF | 3988043 | 3988057 |
| Paris<br>(France)       | Jheh-2-Jheh-3  | hb          | TF | 3988679 | 3988688 |
| Paris<br>(France)       | Jheh-2-Jheh-3  | Ubx         | TF | 3988764 | 3988771 |
| Reference<br>genome     | Jheh-2-Jheh-3  | dl          | TF | 3987904 | 3987915 |
| Reference<br>genome     | Jheh-2-Jheh-3  | cad         | TF | 3988702 | 3988712 |
| Reference<br>genome     | Jheh-2-Jheh-3  | cnc::maf-S  | TF | 3988044 | 3988058 |
| Reference<br>genome     | Jheh-2-Jheh-3  | hb          | TF | 3988680 | 3988689 |
| Reference<br>genome     | Jheh-2-Jheh-3  | Ubx         | TF | 3988765 | 3988772 |
| Sapporo<br>(Japan)      | Jheh-2-Jheh-3  | cad         | TF | 3988594 | 3988604 |
| Sapporo<br>(Japan)      | Jheh-2-Jheh-3  | cnc::maf-S  | TF | 3988043 | 3988057 |
| Sapporo<br>(Japan)      | Jheh-2-Jheh-3  | hb          | TF | 3989189 | 3989198 |
| Sapporo<br>(Japan)      | Jheh-2-Jheh-3  | Ubx         | TF | 3988683 | 3988690 |
| Sapporo<br>(Japan)      | Jheh-2-Jheh-3  | Ubx         | TF | 3988774 | 3988781 |
| Tokyo<br>(Japan)        | Jheh-2-Jheh-3  | cnc::maf-S  | TF | 3988042 | 3988056 |
| Tokyo<br>(Japan)        | Jheh-2-Jheh-3  | hb          | TF | 3989215 | 3989224 |
| Watsonville<br>(U.S.A)  | Jheh-2-Jheh-3  | cad         | TF | 3988809 | 3988819 |
| Watsonville<br>(U.S.A)  | Jheh-2-Jheh-3  | cnc::maf-S  | TF | 3988042 | 3988056 |
| Watsonville<br>(U.S.A)  | Jheh-2-Jheh-3  | hb          | TF | 3988790 | 3988799 |
| Dayton<br>(U.S.A)       | Jheh-3-CG43069 | ARNT::HIF1A | TF | 3991698 | 3991705 |
| Dayton<br>(U.S.A)       | Jheh-3-CG43069 | cad         | TF | 3991337 | 3991347 |
| Dayton<br>(U.S.A)       | Jheh-3-CG43069 | cad         | TF | 3991874 | 3991884 |
| Dayton<br>(U.S.A)       | Jheh-3-CG43069 | cad         | TF | 3991845 | 3991855 |
| Dayton<br>(U.S.A)       | Jheh-3-CG43069 | Deaf1       | TF | 3991182 | 3991187 |
| Dayton<br>(U.S.A)       | Jheh-3-CG43069 | Deaf1       | TF | 3991006 | 3991011 |
| Dayton                  | Jheh-3-CG43069 | Ubx         | TF | 3991351 | 3991358 |

| (U.S.A)                 |                |             |    |         |         |
|-------------------------|----------------|-------------|----|---------|---------|
| Montpellier<br>(France) | Jheh-3-CG43069 | ARNT::HIF1A | TF | 3991877 | 3991884 |
| Montpellier<br>(France) | Jheh-3-CG43069 | cad         | TF | 3992054 | 3992064 |
| Montpellier<br>(France) | Jheh-3-CG43069 | cad         | TF | 3992024 | 3992034 |
| Montpellier<br>(France) | Jheh-3-CG43069 | Deaf1       | TF | 3991182 | 3991187 |
| Montpellier<br>(France) | Jheh-3-CG43069 | Deaf1       | TF | 3991744 | 3991749 |
| Montpellier<br>(France) | Jheh-3-CG43069 | Deaf1       | TF | 3991006 | 3991011 |
| Montpellier<br>(France) | Jheh-3-CG43069 | Ubx         | TF | 3991589 | 3991596 |
| Reference<br>genome     | Jheh-3-CG43069 | cad         | TF | 3991933 | 3991943 |
| Reference<br>genome     | Jheh-3-CG43069 | cad         | TF | 3991674 | 3991684 |
| Reference<br>genome     | Jheh-3-CG43069 | cad         | TF | 3991696 | 3991706 |
| Reference<br>genome     | Jheh-3-CG43069 | cad         | TF | 3991903 | 3991913 |
| Reference<br>genome     | Jheh-3-CG43069 | Deaf1       | TF | 3991182 | 3991187 |
| Reference<br>genome     | Jheh-3-CG43069 | hb          | TF | 3991695 | 3991704 |
| Reference<br>genome     | Jheh-3-CG43069 | Ubx         | TF | 3991667 | 3991674 |
| Sapporo<br>(Japan)      | Jheh-3-CG43069 | cad         | TF | 3992103 | 3992113 |
| Sapporo<br>(Japan)      | Jheh-3-CG43069 | cad         | TF | 3991844 | 3991854 |
| Sapporo<br>(Japan)      | Jheh-3-CG43069 | cad         | TF | 3991866 | 3991876 |
| Sapporo<br>(Japan)      | Jheh-3-CG43069 | cad         | TF | 3992073 | 3992083 |
| Sapporo<br>(Japan)      | Jheh-3-CG43069 | Deaf1       | TF | 3991182 | 3991187 |
| Sapporo<br>(Japan)      | Jheh-3-CG43069 | hb          | TF | 3991572 | 3991581 |
| Sapporo<br>(Japan)      | Jheh-3-CG43069 | hb          | TF | 3991865 | 3991874 |
| Sapporo<br>(Japan)      | Jheh-3-CG43069 | Ubx         | TF | 3991597 | 3991604 |
| Sapporo<br>(Japan)      | Jheh-3-CG43069 | Ubx         | TF | 3991837 | 3991844 |
| Tokyo<br>(Japan)        | Jheh-3-CG43069 | cad         | TF | 3991924 | 3991934 |
| Tokyo<br>(Japan)        | Jheh-3-CG43069 | cad         | TF | 3991665 | 3991675 |
| Tokyo<br>(Japan)        | Jheh-3-CG43069 | cad         | TF | 3991894 | 3991904 |

|                        |                |             |    |         |         |
|------------------------|----------------|-------------|----|---------|---------|
| Tokyo<br>(Japan)       | Jheh-3-CG43069 | Deaf1       | TF | 3991176 | 3991181 |
| Tokyo<br>(Japan)       | Jheh-3-CG43069 | Ubx         | TF | 3991688 | 3991695 |
| Tokyo<br>(Japan)       | Jheh-3-CG43069 | Ubx         | TF | 3991281 | 3991288 |
| Watsonville<br>(U.S.A) | Jheh-3-CG43069 | ARNT::HIF1A | TF | 3991698 | 3991705 |
| Watsonville<br>(U.S.A) | Jheh-3-CG43069 | cad         | TF | 3991337 | 3991347 |
| Watsonville<br>(U.S.A) | Jheh-3-CG43069 | cad         | TF | 3991877 | 3991887 |
| Watsonville<br>(U.S.A) | Jheh-3-CG43069 | Deaf1       | TF | 3991182 | 3991187 |
| Watsonville<br>(U.S.A) | Jheh-3-CG43069 | Ubx         | TF | 3991351 | 3991358 |
| Paris<br>(France)      | Jheh-3-CG43069 | ARNT::HIF1A | TF | 3991784 | 3991791 |
| Paris<br>(France)      | Jheh-3-CG43069 | cad         | TF | 3991961 | 3991971 |
| Paris<br>(France)      | Jheh-3-CG43069 | cad         | TF | 3991368 | 3991378 |
| Paris<br>(France)      | Jheh-3-CG43069 | cad         | TF | 3991686 | 3991696 |
| Paris<br>(France)      | Jheh-3-CG43069 | cad         | TF | 3991931 | 3991941 |
| Paris<br>(France)      | Jheh-3-CG43069 | Deaf1       | TF | 3991177 | 3991182 |
| Paris<br>(France)      | Jheh-3-CG43069 | hb          | TF | 3991367 | 3991376 |
| Paris<br>(France)      | Jheh-3-CG43069 | Ubx         | TF | 3991408 | 3991415 |
| Paris<br>(France)      | Jheh-3-CG43069 | Ubx         | TF | 3991412 | 3991419 |
| Paris<br>(France)      | Jheh-3-CG43069 | Ubx         | TF | 3991346 | 3991353 |
| Paris<br>(France)      | Jheh-3-CG43069 | Ubx         | TF | 3991410 | 3991417 |
| Paris<br>(France)      | Jheh-3-CG43069 | Ubx         | TF | 3991414 | 3991421 |

59

60

61
